***Zebrafish yolk syncytial nuclei migrate along a dynamic microtubule network***

Zhonghui Fei<sup>1\*</sup>, Koeun Bae<sup>1\*</sup>, Serge E. Parent<sup>1</sup>, Katharine Goodwin<sup>2,3</sup>, Guy Tanentzapf<sup>2</sup>  
and Ashley E.E. Bruce<sup>1‡</sup>

**1** Department of Cell and Systems Biology  
University of Toronto  
Toronto, ON M5S 3G5

**2** Life Sciences Institute  
Vancouver Campus  
2350 Health Sciences Mall  
Vancouver, BC Canada V6T 1Z3

**3** Current address:  
Department of Chemical & Biological Engineering  
Princeton University  
303 Hoyt Laboratory  
William Street  
Princeton, NJ 08544

\* These authors contributed equally to this work.

‡Corresponding author  
[ashley.bruce@utoronto.ca](mailto:ashley.bruce@utoronto.ca)  
[orcid.org/0000-0002-0567-2928](https://orcid.org/0000-0002-0567-2928)

Running title: Yolk syncytial nuclear migration

Keywords: zebrafish, epiboly, yolk syncytial layer, yolk syncytial nuclei, microtubule, LINC complex

1 Summary Statement

2 Analysis of yolk syncytial nuclear migration during zebrafish epiboly reveals that nuclei migrate  
3 along and largely beneath a dynamically yolk microtubule network.

4

5

6 Abstract

7 In teleosts, the yolk syncytial layer is a multinucleate syncytium that functions as an  
8 extraembryonic signaling center to pattern the mesendoderm, coordinate morphogenesis and  
9 supply nutrients to the embryo. The zebrafish is an excellent system for studying this  
10 morphogenetically active tissue. The external yolk syncytial nuclei (e-YSN) undergo microtubule  
11 dependent epiboly movements that distribute the nuclei over the yolk. How e-YSN epiboly  
12 proceeds, and what role the yolk microtubule network plays is not understood but currently it is  
13 proposed that e-YSN are pulled vegetally as the microtubule network shortens from the vegetal  
14 pole. Data from our live imaging studies suggest that the yolk microtubule network is dismantled  
15 from the animal and vegetal regions and show that a region of stabilized microtubules forms  
16 before nuclear migration begins. e-YSN do not appear to be pulled vegetally but rather move  
17 along a dynamic microtubule network. We also show that overexpression of the KASH domain  
18 of Syne2a impairs e-YSN movement, implicating the LINC complex in e-YSN migration. This  
19 work provides new insights into the role of microtubules in morphogenesis of an extraembryonic  
20 tissue.

21

22

23

24

25

## 26 **Introduction**

27 Embryonic development involves coordinated cell shape changes and movements to establish the  
28 adult body plan and developmental programs are inextricably linked to embryo architecture. In  
29 teleosts, the yolk syncytial layer (YSL) is a conserved and essential extraembryonic signaling  
30 center which contains transcriptionally active yolk syncytial nuclei (YSN). The YSL has  
31 numerous functions including induction and patterning of mesendoderm, coordination of epiboly  
32 movements and provision of nutrients to the embryo (Mizuno et al. 1999; Feldman et al. 1998;  
33 Ober & Schulte-Merker 1999; Rodaway et al. 1999; Gritsman et al. 2000; Koos & Ho 1998;  
34 Thomas 1968; Ho et al. 1999; Sirotkin et al. 2000; Fekany et al. 1999; Fekany-Lee et al. 2000;  
35 Chen & Kimelman 2000). In addition, the YSL undergoes surprisingly dynamic shape changes  
36 during development, making it an excellent system to gain new insights into morphogenesis of an  
37 extraembryonic tissue (Carvalho et al. 2009; D'Amico & Cooper 2001; Virta & Cooper 2011).  
38 YSL functions rely upon YSN transcription (Chen & Kimelman 2000; Xu et al. 2012) and a  
39 population of YSN undergo active epiboly movements which distributes the nuclei over the yolk  
40 surface (D'Amico & Cooper 2001; Carvalho et al. 2009). When the nuclei are not properly  
41 distributed, epiboly and patterning are adversely affected (Carvalho & Heisenberg 2010; Xu et al.  
42 2012; Takesono et al. 2012).

43  
44 The YSL forms as a result of meroblastic cleavages which generates the blastoderm on top of a  
45 large yolk cell (Carvalho & Heisenberg 2010; Kimmel & Law 1985; Trinkaus 1993). In  
46 zebrafish, incomplete early cleavages result in marginal blastomeres remaining open to the yolk  
47 cell and, around the time of the maternal-zygotic transition, marginal blastomeres release their  
48 cytoplasm and nuclei into the previously anuclear yolk cell to form the YSL. The YSL consists of  
49 the external-YSL (e-YSL) at the yolk-blastoderm exterior interface while the internal YSL (i-  
50 YSL) lies directly beneath the blastoderm (Kimmel & Law 1985). Yolk syncytial nuclei (YSN)  
51 are located in both regions and are referred to as e-YSN and i-YSN (Kimmel et al. 1995) (Fig.  
52 1A). YSN undergo several mitotic divisions before they exit the cell cycle (Kane et al. 1992).  
53 YSN become enlarged and in some species, have been shown to become polyploid (Bachop and  
54 Schwartz, 1974).

55  
56 Epiboly is a major cell movement during teleost development. Epiboly involves the thinning and  
57 spreading of a multilayer of cells and the active motive force provided by the YSL is absolutely

58 required for this process (Trinkaus 1963). During epiboly, the blastoderm and YSL spread down  
59 towards the vegetal pole to cover and enclose the yolk cell by 10 hpf (Fig. 1A). The blastoderm  
60 generates all embryonic tissues and it consists of an outer epithelial layer, the enveloping layer  
61 (EVL), which is tightly attached at its margin to the yolk cell and covers the underlying deep  
62 cells. In zebrafish, epiboly begins at 4.3 hours post-fertilization (hpf), following the cessation of  
63 YSN mitotic divisions and lineage specification of the EVL (Kimmel et al. 1995). The e-YSL has  
64 been shown to provide mechanical force necessary to drive epiboly via actomyosin motors  
65 (Behrndt et al. 2012; Cheng et al. 2004). There is also a distinct longitudinal microtubule array  
66 that is often disrupted in embryos with abnormal epiboly (reviewed in Lepage & Bruce 2010;  
67 Bruce 2016). The microtubule network is nucleated from the most vegetally positioned e-YSN in  
68 the YSL and oriented along the animal-vegetal axis with the microtubule plus ends extending into  
69 the yolk cytoplasmic layer (YCL), which is a thin layer of cytoplasm that surrounds the dense  
70 core of yolk granules (Strähle & Jesuthasan 1993; Solnica-Krezel & Driever 1994). During  
71 epiboly, the microtubule network shortens as the YCL is gradually replaced by the YSL (Solnica-  
72 Krezel & Driever 1994).

73  
74 The dramatic morphogenetic changes in the YSL and its role in promoting epiboly have been  
75 recognized for some time, but much remains to be learned about the mechanisms that drive yolk  
76 morphogenesis. The yolk cell microtubules were first implicated in YSL epiboly in studies from  
77 Jesuthasan and Strahle (1993) and Solnica-Krezel and Driever (1994). Ultra-violet irradiation of  
78 cleavage stage embryos or treatment with the microtubule depolymerizing drug nocodazole  
79 resulted in delayed epiboly (Strähle & Jesuthasan 1993). Solnica-Krezel and Driever (1994)  
80 showed that treatment of late blastula stage embryos with nocodazole prevented the e-YSN from  
81 moving vegetally during epiboly. In contrast, vegetal movement of the blastoderm was not as  
82 strongly impaired, although epiboly movements were slowed. Taxol treatment, which stabilizes  
83 microtubules, slowed epiboly of the YSL and blastoderm to similar extents (Solnica-Krezel &  
84 Driever 1994).

85  
86 Jesuthasan and Strahle (1993) proposed that the yolk microtubule network comprises part of the  
87 epiboly motor. They suggested that yolk microtubules act to expand the YSL via microtubule  
88 motors moving vegetally along the microtubules, and pulling the attached blastoderm along with  
89 it. In contrast, Solnica-Krezel and Driever (1994) found that epiboly of the e-YSN, but not of the

90 blastoderm, was completely dependent upon the yolk microtubules. They postulated that the  
91 primary function of the network is to move the e-YSN vegetally during epiboly and that epiboly  
92 of the blastoderm is independent from epiboly of the e-YSN. They put forward several potential  
93 models in which different microtubule motors could provide pulling or pushing forces to move  
94 the e-YSN. One model was that, as the yolk microtubules shorten from the vegetally located plus  
95 ends, the e-YSN are pulled downwards (Solnica-Krezel & Driever 1994).

96  
97 The positioning and movement of nuclei is important in a number of developmental contexts  
98 (Bone & Starr 2016). The linker of nucleoskeleton and cytoskeleton (LINC) complex has  
99 emerged as an important and conserved component of the nucleus that functions to connect  
100 structural elements in the nucleus to the cytoskeleton (Starr & Fridolfsson 2010). The complex  
101 consists of Sad1p/UNC-84 (SUN) and Klarsicht/ANC-1/Syne (KASH) proteins, located in the  
102 inner and outer nuclear membranes respectively. The LINC complex is capable of interacting  
103 with microtubules, centrosomes, F-actin, intermediate filaments and the microtubule motor  
104 proteins dynein and kinesin (Starr & Fridolfsson 2010; Chang et al. 2015). Well established  
105 examples of microtubule based nuclear movement include pronuclear fusion, muscle fiber  
106 development, and neuronal interkinetic nuclear migration (Bone & Starr 2016).

107  
108 How e-YSN move towards the vegetal pole remains unclear. In addition, the dynamics of the  
109 yolk microtubule network have not been reported in detail during epiboly. Here we revisit these  
110 questions using live imaging and quantitative analyses. We show that the organization of the yolk  
111 cell microtubule network undergoes striking changes just prior to e-YSN movement, which have  
112 not previously been reported. We observed that e-YSN move vegetally through and largely  
113 beneath the microtubule network, in contrast to the current view. In addition, we show that the  
114 LINC complex appears to be involved in e-YSN epiboly. We present a new model for e-YSN  
115 movement that takes into account the observed changes in microtubule dynamics and proposes  
116 that microtubule motor proteins interact directly with e-YSN via the LINC complex to drive  
117 vegetal e-YSN movement.

118

## 119 **Results**

### 120 *The yolk microtubule network undergoes dynamic changes during epiboly*

121 The yolk microtubule network covers approximately 400 microns along the animal-vegetal (A-V)

122 axis of the exposed multinucleate yolk cell at the start of epiboly (Kimmel et al. 1995). The yolk  
123 cell size is about ten times that of a typical cell, which may enable the formation of microtubule  
124 patterns that are not possible in smaller cells due to the differences in scale. To learn more about  
125 how e-YSN use microtubules for their movement, we examined the organization and dynamics of  
126 the network in live embryos. To accomplish this we used embryos from the previously  
127 characterized transgenic line Tg:(XIEef1a1:dclk2DeltaK-GFP) in which microtubules are  
128 indirectly labeled via binding of a microtubule associated protein fused to GFP (Sepich et al.  
129 2011). For our analyses, we divided epiboly into early (dome to shield, 4.3-6 hpf), mid- (shield-  
130 75% epiboly, 6-8 hpf) and late (75% epiboly-bud, 8-10 hpf) stages (Fig. 1A).

131  
132 At sphere stage, prior to epiboly initiation, the yolk cell microtubule network in both transgenic  
133 and alpha-tubulin stained embryos was nucleated from microtubule organizing centers associated  
134 with a subset of the most vegetally positioned e-YSN (Fig. 1B). Based on appearance, we refer to  
135 microtubules nucleated from an individual e-YSN as a ‘branch’ since they broadened as they  
136 extended vegetally (Fig. 1B). We also observed gaps between microtubule branches emanating  
137 from adjacent e-YSN (Fig. 1D’). Although the yolk microtubule network originated from the e-  
138 YSN, the widening of the branches vegetally suggested that vegetal microtubules were unlikely  
139 to be nucleated entirely from e-YSN associated microtubule organizing centers, given the size of  
140 the yolk cell and based on other analyses described below. This observation is consistent with  
141 work in *Xenopus* eggs showing that microtubules can be nucleated from existing microtubules  
142 and that interphase cytoplasm has the ability to support spontaneous microtubule growth  
143 (Ishihara et al. 2014).

144  
145 To examine microtubule network dynamics, we generated low magnification confocal time-lapse  
146 movies of live transgenic embryos. In movies that captured the last YSN division during sphere  
147 stage, we observed that the division was accompanied by what resembled a wave of microtubule  
148 bundling followed by the re-establishment of the network from the e-YSN (Movie 1). This  
149 observation supports the idea that the e-YSN provide the polarity and the basic scaffold upon  
150 which the yolk microtubule network is built. We also note that this type of microtubule network  
151 is not observed in regularly sized cells, which would be encompassed within the width of a single  
152 microtubule branch.

153

154 The blastoderm began to spread vegetally shortly after the final YSN division. During early  
155 epiboly, a region of reduced fluorescence became increasingly apparent between the blastoderm  
156 margin and the vegetal microtubules in the YCL (Fig. 1C', bracket). During mid-epiboly, this  
157 band of reduced fluorescence, which we refer to as the dim zone (DZ), moved vegetally ahead of  
158 the blastoderm. On close observation, it was apparent that microtubules were present in the DZ  
159 but they appeared to be more diffuse and microtubule fragments were rarely observed, suggesting  
160 a change in microtubule organization (Fig. 1E'', inset). More intensely fluorescent, and  
161 potentially bundled, microtubules were apparent vegetal to the DZ. We also observed that in  
162 some *dclk2DeltaK-GFP* expressing embryos, microtubules cleared from the vegetal area of the  
163 yolk cell (Fig. 1E', arrowhead). We postulated that this could result from depolymerization at the  
164 vegetal pole or from upward movement of the network towards the animal pole, or from a  
165 combination of the two. Around 60% epiboly, individual e-YSN began to move vegetally (Fig.  
166 1C'') which will be described below. As epiboly progressed the gaps between microtubule  
167 branches were less apparent (for example Fig. 1D'''). During late epiboly, the DZ became less  
168 distinct as the network became disorganized (Fig. 1C''', D''', E'''). Our observations were  
169 consistent with reports that the microtubules shorten over the course of epiboly (Solnica-Krezel  
170 & Driever 1994) but the DZ in the upper region of the yolk suggested that depolymerization from  
171 the vegetal pole might not be the exclusive mechanism.

172

### 173 *The dim zone moves vegetally during epiboly*

174 To confirm and quantify our observations, fluorescence intensity measurements and kymographs  
175 of *dclk2DeltaK-GFP* time-lapse movies were generated (Fig. 2A,B). We were able to define the  
176 DZ as a minimum between the blastoderm and the vegetal mass of microtubules in the yolk cell  
177 in A-V fluorescence profile plots taken from the center of the embryo (Fig. 2A). The fluorescence  
178 profiles revealed that the signal was high and relatively noisy in the blastoderm, as well as in the  
179 vegetal region of the yolk cell. By contrast, the DZ was characterized as a valley between the  
180 blastoderm and vegetal pole in which the fluorescence profile was smooth. These observations  
181 are consistent with the more diffuse organization of microtubules and an overall reduction in  
182 microtubules in the DZ. By tracking the DZ over time we observed that in all cases the DZ  
183 moved towards the vegetal pole (Fig. 2B). The mean speed of the DZ was constant at  
184 approximately  $0.826 \mu\text{m}/\text{min} \pm 0.146 \mu\text{m}/\text{min}$ , until late epiboly when the DZ could no longer be  
185 reliably detected. Mean speeds for each embryo are given in Table 1. The speed of the DZ is

186 roughly similar to the reported rate of 15% per hour for blastoderm epiboly from shield to bud  
187 stage (Kimmel et al. 1995), which is approximately equivalent to 0.75 $\mu$ m/min.

188  
189 Particle Image Velocimetry (PIV) analysis of four *dclk2DeltaK*-GFP time-lapse movies was done  
190 to further analyze microtubule movements (Fig. 2C,D). This analysis focused on the vegetal  
191 microtubules just below the DZ from early epiboly through the start of mid-epiboly. As expected,  
192 movement predominated along the A-V axis, rather than laterally. In embryos 1-3, there was  
193 greater mean displacement upwards towards the animal pole than downwards towards the vegetal  
194 pole (Fig. 2C red boxes, D). Embryo 4 differed in that there was greater mean displacement  
195 towards the vegetal pole than towards the animal pole throughout the time lapse (Fig. 2C,D). In  
196 all 4 embryos, the mean A-V speeds were an order of magnitude slower than the speed of the DZ.  
197 These findings suggest that the predominant event from early to mid-epiboly is the change in  
198 microtubule dynamics in the DZ and its vegetal progression. Microtubules within the DZ  
199 appeared to become more diffuse and the fluorescence was reduced. These observations suggest  
200 that the microtubule network is being dismantled, at least in part, from the top as the DZ moves  
201 vegetally. Below the DZ, fluorescence intensity was higher than within the DZ and microtubules  
202 were clearly visible. We hypothesized that this subset of microtubules might be more stable due  
203 to the accumulation of post-translational modifications.

204

### 205 ***Detyrosinated tubulin is present in a subset of microtubules during mid-epiboly***

206 To investigate the potential heterogeneity of the yolk cell network, we performed whole-mount  
207 antibody staining for detyrosinated tubulin, which is associated with longer-lived microtubules in  
208 vivo (Song & Brady 2014; Webster et al. 1987; Kreis 1987). Detyrosinated microtubules are  
209 typically present in cells, though often at very low levels, leading to the convention that  
210 detyrosinated microtubules are defined by detection over background using anti-detyrosinated  
211 tubulin antibodies (Bulinski & Gundersen 1991). Antibody staining in the yolk cell was  
212 technically challenging due to fixation, penetration and yolk trapping issues. Detyrosinated  
213 tubulin was detected by antibody staining in a subset of microtubules in the central region of the  
214 yolk of mid-epiboly stage embryos but was undetectable in sphere stage embryos (Fig. 3).  
215 Detyrosinated microtubules were located vegetally to the DZ and they did not extend to the  
216 vegetal pole. At 60% epiboly, migrating e-YSN could be seen about to enter this region (Fig. 3B,  
217 arrowhead). The antibody staining results were consistent with the idea that a subpopulation of



218 stabilized detyrosinated microtubules is present during mid-epiboly outside the DZ.

219

220 ***EB3-GFP reveals widespread microtubule polymerization during early epiboly***

221 To further characterize microtubule dynamics during epiboly, we investigated polymerization of  
222 the yolk cell microtubule network in live embryos by injecting *eb3-gfp* RNA into 1-cell stage  
223 embryos. EB3 is a microtubule plus end tracking protein that binds to actively growing  
224 microtubule plus ends and thus can provide information about the location and rate of  
225 microtubule growth as well as the polarity of the network (Stepanova et al. 2003). Embryos  
226 injected with *eb3-gfp* RNA were examined by confocal time-lapse microscopy from sphere to  
227 85% epiboly. EB3-GFP fluorescent streaks (or comets) indicate active microtubule  
228 polymerization from the plus end.

229

230 Surprisingly, large numbers of EB3-GFP comets were visible throughout the yolk cell at sphere  
231 stage, indicating extensive microtubule growth (Fig. 4A, Movie 2). Some EB3-GFP comets  
232 clearly initiated at centrosomes associated with e-YSN while others could not be traced back to  
233 the e-YSN, providing support for the presence of non-centrosomal microtubules. EB3-GFP  
234 comets spread downwards towards the vegetal pole, consistent with the network having uniform  
235 polarity with microtubule plus ends extending vegetally (Solnica-Krezel & Driever 1994). Some  
236 comets curved laterally, consistent with morphology of the feather-like branches observed in  
237 *dclk2DeltaK-GFP* embryos. EB3-GFP comets were observed throughout early epiboly stages.  
238 Strikingly, during mid-epiboly the comets began to diminish and were largely undetectable in the  
239 YCL at late epiboly stages (Fig. 4A). Some EB3-GFP comets were still observed in the e-YSL,  
240 positioned close to the blastoderm, animal to the DZ. PIV analysis of a single plane time-lapse  
241 movie focused on the upper region of the yolk cell was consistent with our qualitative  
242 observations, showing that the predominant movement of EB3-GFP comets was along the A-V  
243 axis and directed towards the vegetal pole, with an average speed of 3.6  $\mu\text{m}/\text{min}$  (Fig. 4B). The  
244 small amount of lateral movement might be explained by the feather-like shape of the  
245 microtubule branches.

246

247 To relate microtubule polymerization dynamics to nuclear movement, e-YSN in EB3-GFP  
248 movies were examined. Visible as non-fluorescent ovals, e-YSN could be seen to move out from  
249 regions where EB3-GFP puncta were being produced (Movie 3). As e-YSN moved vegetally

250 EB3-GFP comets were visible behind them. Multiple e-YSN could be observed to move along  
251 microtubule branches being nucleated from stationary microtubule organizing centers. Currently  
252 it is not clear what causes the reduction in EB3-GFP comets and their confinement to the e-YSL.  
253 The reduction in puncta occurred during mid-epiboly, around the time that the DZ formed and  
254 detyrosinated microtubules were first detected. Intriguingly, these two events take place around  
255 that time that e-YSN begin to migrate. The temporal correlation between these events suggests  
256 that they might be linked and important for e-YSN movement.

257  
258 ***e-YSN move along and beneath the yolk microtubule network***  
259 The e-YSN start to move vegetally during mid-epiboly, after the formation of the shield (the  
260 zebrafish organizer) but what triggers the movement is not known (Solnica-Krezel & Driever  
261 1994). We identified changes in the yolk microtubule network during mid-epiboly, before the e-  
262 YSN start to migrate. We postulated that initiation of e-YSN movement could be related to these  
263 changes. Thus, we sought to understand the relationship between the e-YSN and the yolk  
264 microtubules in more detail.

265  
266 In low power time lapse movies of Tg:(dclk2DeltaK-GFP) and Tg:(XlEefla1:GFP-tuba8l)  
267 embryos, migrating e-YSN were visible as non-fluorescent ovals surrounded by fluorescent  
268 microtubules (Figs. 1C'', 5A). Interestingly, as e-YSN began to migrate, they were often seen to  
269 move along the same trajectory. In a representative example, a single e-YSN moved vegetally  
270 and then shifted slightly medially, at which point a second e-YSN fell in line behind it and then a  
271 third e-YSN joined the line as if on a track (Fig. 5A). e-YSN often appeared to be linked, similar  
272 to previous reports of e-YSN chains connected by nuclear bridges (D'Amico & Cooper 2001).  
273 The strings of e-YSN were associated with microtubule branches extending from the YSL,  
274 confirming our observations that e-YSN move along EB3-GFP branches. Migrating e-YSN  
275 moved through the DZ, where the branches were less distinct, and then into the dense vegetal  
276 network of microtubules in the lower yolk.

277  
278 e-YSN speed was determined using 2D confocal projections of the time-lapse movies. e-YSN  
279 moved on average at approximately  $1.936 \pm 0.025$   $\mu\text{m}/\text{min}$  (see Table 2 for mean speeds per  
280 embryo; Table S1 mean speeds per nuclei). Nuclei did not appear to move at a uniform speed  
281 (Fig. 5B) but rather exhibited slow vegetal-ward movement punctuated by bursts of increased

282 speed. These bursts of speed did not occur simultaneously, consistent with each e-YSN moving  
283 independently. Interestingly, the average speed was faster than blastoderm and DZ epiboly  
284 supporting the proposal that e-YSN epiboly is independent from blastoderm epiboly (Solnica-  
285 Krezel & Driever 1994).

286  
287 e-YSN movement was further examined using spinning disk confocal time-lapse microscopy of  
288 Tuba81-GFP expressing embryos in which nuclei were fluorescently labeled with H2A-GFP.  
289 Consistent with Solnica-Krezel and Driever (1994) and our low power time-lapse movies, as the  
290 e-YSN began to move they typically underwent a shape change from round to elongate with the  
291 pointed end indicating the direction of movement (Fig. 5C). This shape change was most  
292 prominent around 60% epiboly, when the movement initiated. As the nuclei moved they  
293 exhibited small bulges and contractions on their surface (Movie 4). We confirmed that nuclear  
294 movements were continuous with short bursts of faster movement and migrating e-YSN were not  
295 observed to move backwards. Nuclei moved within individual microtubule branches and were  
296 not seen to cross the gap between branches. To understand the 3-dimensional relationship  
297 between the yolk microtubules and the e-YSN, we inspected Z-stacks from spinning disk  
298 confocal movies, and observed that the bulk of the microtubule network was more superficially  
299 located than the e-YSN (Fig. 5D). In the deepest e-YSN focal plane, microtubules were visible  
300 around the nuclei but were otherwise sparse compared to more superficial planes.

301  
302 ***Over-expression of a dominant-negative KASH construct disrupts e-YSN movement***

303 There are several known mechanism whereby microtubules mediate nuclear migration  
304 (Gundersen & Worman 2013). In large cells, microtubules can exert pulling forces on  
305 centrosomes, which often involves cortically anchored dynein. Another method, common during  
306 developmental processes and exemplified by female pronuclear migration, involves nuclear  
307 envelope associated motor proteins ‘walking’ the nucleus down the microtubules (Gundersen &  
308 Worman 2013). Given our observation that the e-YSN move past and beneath the yolk  
309 microtubule network, we hypothesized that motor proteins move the e-YSN by directly  
310 associating with them. In addition, the formation of the DZ and the observation that e-YSN move  
311 through this region appears incompatible with vegetally anchored motor proteins pulling the e-  
312 YSN down the length of the yolk cell. We explored the possibility that the LINC complex, which  
313 is known to interact with microtubules and microtubule motor proteins (Starr & Fridolfsson

314 2010), was involved in e-YSN migration. Work in other systems, including the zebrafish retina,  
315 showed that overexpression of the KASH domain alone can impair nuclear movement by acting  
316 in a dominant-negative fashion to disrupt interactions between the LINC complex and  
317 cytoskeletal components or motor proteins (Tsujikawa et al. 2007; Grady et al. 2005).

318  
319 To test the potential role of the LINC complex in e-YSN nuclear movement, we overexpressed  
320 the KASH domain of zebrafish *Syne2a* (C-*syne2a*) (Tsujikawa et al. 2007). Embryos were  
321 injected at the 1-cell stage with a mixture of *c-syne2a* and *h2a-gfp* RNA or with *h2a-gfp* RNA  
322 alone as a control. Confocal time-lapse microscopy was performed on injected embryos during  
323 mid-epiboly stages. In control embryos, e-YSN elongated in the direction of movement (Fig. 6  
324 cell #1, Movie 5) as they moved towards the vegetal pole, as described above. In *c-syne2a*  
325 injected embryos, epiboly was overtly normal, however there were defects in the appearance and  
326 behavior of the e-YSN. The e-YSN did not become elongated to point in the direction of  
327 movement but were more globular in shape. Furthermore, instead of moving vegetally some e-  
328 YSN in *c-syne2a* injected embryos rotated sideways such that their movement was perpendicular  
329 to the A-V axis (Fig. 6 cells #2 and #3, Movie 6). Other e-YSN moved animally and some were  
330 overrun by the advancing blastoderm margin (Fig. 6 cell #1). These behaviors were not observed  
331 in control embryos. In *c-syne2a* injected embryos, most e-YSN were still carried vegetally,  
332 though in a less directed manner and we hypothesize that this movement is passive as a result of  
333 expansion of the YSL. These results suggest that SUN-KASH proteins are involved in directed e-  
334 YSN movement.

335  
336 We postulate that the LINC complex interacts directly with microtubule motors to move the e-  
337 YSN. Typically, centrosomes remain associated with nuclei as they migrate (Dupin & Etienne-  
338 Manneville 2011). Centrosomes can be located in front of the nucleus as it moves, with force  
339 transmitted to the nucleus via microtubules anchored at the centrosome (Solecki et al. 2004). In  
340 this scenario, dynein, a minus end directed motor, would be expected to drive nuclear movement  
341 in the yolk. However, the centrosome does not always lead the migration (Umeshima et al. 2007)  
342 and if this were the case, given the polarity of the yolk microtubule network, the plus end directed  
343 motor kinesin would be expected to be involved. To determine the location of the centrosome  
344 during e-YSN migration, we performed gamma-tubulin antibody staining. Gamma-tubulin was  
345 detected in association with e-YSN in the YSL at sphere and dome stages (not shown) but we

346 were unable to detect gamma-tubulin in the yolk at later stages, due to background fluorescence.  
347 Our attempts to visualize the centrosome in live embryos during late epiboly by injecting RNA  
348 encoding Centrin-GFP or Gamma-tubulin-GFP were also unsuccessful. Thus, additional data are  
349 required to determine the position of the centrosome during nuclear migration as well as the  
350 motor protein involved.

351

## 352 **Discussion**

353 The YSL is critically important for patterning and morphogenesis of the blastoderm. Previous  
354 work demonstrated that e-YSN undergo active microtubule dependent epiboly movements during  
355 gastrulation (Solnica-Krezel & Driever 1994; Carvalho et al. 2009; D'Amico & Cooper 2001).  
356 How epiboly of the e-YSN proceeds, and what role the yolk microtubule network performs  
357 during the process is not understood. Here we find that the e-YSN move along and largely  
358 beneath the cortical microtubule network. In addition, we identified changes in the structure and  
359 dynamics of the network that occur prior to e-YSN movement. Our results also implicate the  
360 LINC complex in e-YSN migration, confirming that microtubules are functionally involved.

361

### 362 *Yolk Microtubule Organization and Dynamics*

363 The e-YSN nucleate initially non-overlapping microtubule branches which broaden and extend to  
364 the vegetal pole of the yolk cell. We propose that parts of the equatorial and vegetal network  
365 contain non-centrosomal microtubules. Non-centrosomal microtubules can be nucleated from  
366 golgi membranes, the nuclear envelop or from existing microtubules (Petry & Vale 2015; Lüders  
367 & Stearns 2007). We think it likely that vegetal microtubules are nucleated from existing  
368 microtubules, as reported for interphase *Xenopus* egg extracts (Ishihara et al. 2014). Although the  
369 zebrafish embryo is not as large as the *Xenopus* egg (750 $\mu$ m versus 1250 $\mu$ m), in both cases a  
370 yolk microtubule network forms over a distance that is much greater than a single cell. In  
371 addition, the smaller zebrafish embryo evolved from a large-egged ancestor similar to present day  
372 frogs (Cooper & Virta 2007), suggesting that mechanisms for generating the yolk microtubule  
373 network may be conserved. The *Xenopus* work also showed that microtubule based nucleation  
374 produces a network of parallel microtubules with uniform polarity (Petry et al. 2013), as is the  
375 case in the zebrafish yolk cell. Proof of this hypothesis will require the detection of gamma-  
376 tubulin at branched nucleation sites on yolk microtubules.

377

378 The yolk microtubule network has been assumed to be established prior to the start of epiboly  
379 and to be progressively shortened from the vegetal pole (Solnica-Krezel & Driever 1994). We  
380 were therefore surprised to see extensive EB3-GFP puncta throughout the yolk cell, which could  
381 reflect the non-centrosomal origin of some microtubules. During early epiboly, we also observed  
382 that the continuity between the upper and lower microtubule network began to diminish, as a  
383 region of reduced microtubule density appeared that we call the dim zone (DZ). Due to technical  
384 issues, we have so far been unable to simultaneously examine labeled EB3 and microtubules in  
385 live embryos which would allow us to understand the timing of these events in greater detail. The  
386 DZ was very obvious in *dclk2DeltaK*-GFP embryos and it was detected in GFP-*tuba8l* embryos.  
387 However, GFP-*tuba8l* embryos exhibit much lower levels of fluorescence than *dclk2DeltaK*-GFP  
388 embryos, which made the DZ more difficult to characterize.

389  
390 After DZ formation, the structure of the microtubules in the DZ changed, although the details and  
391 molecular bases for these changes remains to be determined. Microtubules in the DZ appeared  
392 more diffuse and the overall reduction in fluorescence suggests that some were degraded, which  
393 was supported by time-lapse movies in which microtubule fragments entered the DZ and then  
394 lost their fluorescence. The DZ became more prominent during mid-epiboly stages as it moved as  
395 a wave front towards the vegetal pole as the microtubules vegetal to it shortened. One possibility  
396 is that the DZ represents the leading edge of YSL, which replaces the yolk cytoplasmic layer  
397 during epiboly. Towards the end of epiboly, the network became disorganized and the DZ was no  
398 longer apparent.

399  
400 Microtubule dynamics are controlled by a number of factors including the tubulin isoforms being  
401 expressed (Panda et al. 1994), tubulin post-translational modifications (Janke & Chloë Bulinski  
402 2011), and the activity of different microtubule associated proteins (MAPs) and motors (Heald &  
403 Nogales 2002; van der Vaart et al. 2009). A possible cause for the appearance of the DZ could be  
404 due to cleavage of microtubules by the microtubule severing protein Katanin, which has  
405 previously been reported to play a role in YSL epiboly (Bruce & Sampath 2008). Katanin  
406 severing in the upper region of the yolk cell would generate microtubules with free minus ends  
407 which would be expected either to be depolymerized or stabilized (Akhmanova & Hoogenraad  
408 2015). Microtubules could be stabilized by the minus end binding protein Camsap2a. Camsaps  
409 are a recently identified family of microtubule minus end binding proteins and in other systems,

410 Camsap2 plays a critical role in stabilizing non-centrosomal microtubules (Akhmanova &  
411 Hoogenraad 2015). Expression of zebrafish *camsap2a* is first detected in the e-YSL at sphere  
412 stage (Xu et al. 2012; Hong et al. 2010) where it may have a similar role. Katanin activity is  
413 regulated in a variety of ways and Katanin has been shown to regulate Camsap activity  
414 (Akhmanova & Hoogenraad 2015; Bailey et al. 2015). We postulate that these regulatory  
415 mechanisms control the extent of the DZ. During mid-epiboly, we detected a population of  
416 detyrosinated microtubules just vegetal to the DZ. Detyrosinated microtubules are relatively  
417 long-lived and interestingly, it has been shown that Camsap2 preferentially interacts with  
418 detyrosinated microtubules in cultured U2OS cells (Jiang et al. 2014). Detyrosinated  
419 microtubules are known to pause their growth due to capping (Infante et al. 2000), which could  
420 also contribute to the reduction in EB3-GFP puncta we observed during mid-epiboly. The  
421 stabilization of a subset of microtubules, by Camsap or other MAPs, would then enable further  
422 stabilization via the accumulation of post-translational modifications (Janke & Chloë Bulinski  
423 2011).

424  
425 We propose that timed expression of MAPs could be involved in the observed changes in  
426 microtubule dynamics. At present, the only characterized MAP in the zebrafish yolk cell is  
427 Clip1a, a zebrafish CLIP-170 homolog (Weng et al. 2013). Work from these authors showed that  
428 the steroid pregnenolone is required for normal epiboly and is involved in yolk cell microtubule  
429 stabilization (Hsu et al. 2006). They subsequently showed that pregnenolone functions by binding  
430 to Clip1a which then stimulates microtubule polymerization (Weng et al. 2013). As Clip1a is  
431 maternally expressed and CLIP-170 has been shown to have a preference for tyrosinated tubulin,  
432 it might be involved in the establishment of the network, but this remains to be tested (Ikegami &  
433 Setou 2010; Hsu et al. 2006).

434  
435 Another open question is why the microtubule network is dismantled from the top and bottom.  
436 One possibility we are currently pursuing is a potential connection between the DZ and the actin  
437 cytoskeleton. The DZ is near the actomyosin cable that constricts to close the blastopore during  
438 epiboly (Cheng et al. 2004; Behrndt et al. 2012). In some migratory cells, depolymerizing  
439 microtubules can stimulate actin contractility via RhoA, and RhoA can in turn stabilize  
440 microtubules (Takesono et al. 2010; Chang et al. 2008; Wojnacki et al. 2014; Palazzo et al.  
441 2001). This raises the interesting possibility of cross regulatory interactions between the

442 microtubule and microfilament networks in the yolk cell that might be important for epiboly. We  
443 found that microtubule dynamics change around the same time that the actomyosin band becomes  
444 active (Behrndt et al. 2012). In addition, we observed that the DZ moves at a similar rate as the  
445 blastoderm, and blastoderm movement is driven by the yolk actomyosin motors. An interaction  
446 between these two cytoskeletal networks could help explain why in many examples of defective  
447 epiboly, both actin and microtubules are disrupted (Lachnit et al. 2008; Lee 2014).

448

#### 449 *e-YSN Migration*

450 Before e-YSN begin migrating, the DZ forms, a subset of microtubules become detyrosinated  
451 and EB3-GFP puncta diminish. Initially, e-YSN move along microtubule branches emanating  
452 from microtubule organizing centers producing EB3-GFP puncta and not from regions in  
453 between. This suggests that e-YSN nucleate microtubule tracks for other e-YSN to migrate along.  
454 Our model is that motor proteins, recruited to the e-YSN by the LINC complex, transport the  
455 nuclei through and past the DZ towards the vegetal pole. Thus, a given e-YSN is not linked to  
456 one set of microtubules throughout its movement and e-YSN appear to move through and largely  
457 beneath the bulk of the microtubules. We also saw that in some case microtubules moved slowly  
458 anally, in the opposite direction from migrating nuclei. Taken all together, these data do not  
459 support a model in which e-YSN are pulled by microtubule shortening from the vegetal pole.

460

461 The LINC complex is implicated in nuclear movement in many systems, and in keeping with  
462 this, we find that expression of a dominant-negative KASH domain construct impaired  
463 directional movement of e-YSN. Although our data do not allow us to define the motor protein  
464 involved, we suggest kinesin-1 as a likely candidate. In other systems the plus end directed  
465 microtubule motor kinesin-1 has high affinity for detyrosinated microtubules (Ikegami & Setou  
466 2010). Interestingly, recent work using cultured fibroblasts and neurons demonstrated a novel  
467 function for kinesin-1 in promoting the formation of detyrosinated microtubules (Yasuda et al.  
468 2017). Zebrafish kinesin-1, Kif5Ba, is maternally deposited and expressed throughout  
469 development (Campbell & Marlow 2013). We propose that detyrosination of the network  
470 facilitates kinesin-1 interaction with microtubules and that kinesin-1 is recruited to e-YSN via the  
471 LINC complex. Additional functional studies, as well as determining the location of the  
472 centrosome during e-YSN migration, will help clarify the mechanism of nuclear movement. To  
473 date the only KASH domain protein characterized during early zebrafish development is



474 Lymphoid restricted membrane protein, which is involved in centrosome-nucleus attachment in  
475 the zygote (Lindeman & Pelegri 2012). The LINC complex has been implicated in nuclear  
476 migration in the zebrafish retina (Tsuji-kawa et al. 2007) and several uncharacterized LINC  
477 complex genes are present in the genome.

478  
479 Our work supports previous reports on nuclear migration in the *C. elegans* epidermis, the  
480 hypodermis. The hypodermis undergoes epiboly during ventral enclosure and is essential for axis  
481 elongation (Williams-Masson et al. 1998; Williams-Masson et al. 1997). Hypodermis  
482 morphogenesis involves cell intercalation and microtubule dependent nuclear migration and the  
483 hyp7 hypodermal precursor cells are used as a model for nuclear migration (Williams-Masson et  
484 al. 1998). The KASH domain protein UNC-83 recruits kinesin-1 to the nuclear envelope to drive  
485 nuclear migration along microtubules (Meyerzon et al. 2009). Microtubules are nucleated from  
486 nuclei that are initially positioned at the immobile side of the cell such that a parallel array of  
487 microtubules forms with the plus ends oriented toward the intercalating side of the cell  
488 (Meyerzon et al. 2009). The network is thought to become non-centrosomal since nuclei migrate  
489 in association with their centrosomes. However, the centrosome does not lead the migration,  
490 consistent with the role of the plus end directed motor kinesin-1 (Meyerzon et al. 2009). The  
491 similarities in this system to the zebrafish yolk cell suggest that this mode of nuclear migration  
492 may be evolutionarily conserved. Important differences include the size difference between *C.*  
493 *elegans* cells and the zebrafish yolk cell and the presence of microtubule branches in zebrafish.

494  
495 Our findings are summarized and assembled into a time line in Fig. 7. As epiboly starts, the DZ  
496 becomes apparent, it then moves towards the vegetal pole during epiboly until the late epiboly  
497 when the entire microtubule network becomes disorganized. A subset of deetyrosinated  
498 microtubules becomes detectable at mid-epiboly as the e-YSN begin to migrate towards the  
499 vegetal pole. E-YSN migrate more rapidly than the blastoderm and DZ, and their migration  
500 requires the LINC complex.

501  
502 **Conclusions**  
503 The YSL is conserved in teleosts and is present in other organisms with meroblastic cleavage  
504 including the longnose gar, squid and chicken (Long & Ballard 2001; Wadson & Crawford  
505 2003; Arendt & Nübler-Jung 1999; Nagai et al. 2015). The critical signaling function of the YSL

506 might explain why it is necessary for YSN to be distributed over the yolk surface during epiboly.  
507 During gastrulation different signals are sent to the dorsal and ventral sides of the blastoderm and  
508 gene expression in the YSL is temporally dynamic (Carvalho & Heisenberg 2010; Sun et al.  
509 2014; Thisse & Thisse 2004). One proposal is that the YSL provides stabilizing signals that  
510 enhance the robustness of gastrulation and help maintain regional expression domains in the  
511 blastoderm as widespread cell rearrangements occur (Sun et al. 2014). Later developmental  
512 events also depend upon YSL signaling, such as heart morphogenesis (Trinh & Stainier 2004).  
513 The distribution of YSN is also likely to be important for the nutritive function of the yolk cell  
514 since, as lecithotrophs, zebrafish rely exclusively on the yolk for the first 5 days of development.

515

## 516 **Materials and methods**

### 517 **Zebrafish strains**

518 Zebrafish (*Danio rerio*) were maintained under standard conditions. AB,  
519 Tg(XIEef1a1:dclk2DeltaK-GFP) (gift from Marina Mione) (Sepich et al. 2011), and Tg  
520 (XIEef1a:eGFP-tub $\alpha$ 8l) strains were used. Embryos were acquired from natural spawnings,  
521 maintained at 25-30°C and staged as described (Kimmel et al. 1995). Animals were treated in  
522 accordance with the policies of the University of Toronto Animal Care Committee.

523

### 524 **C-Syne2a construct**

525 cDNA from 1 day post-fertilization embryos was synthesized using the Protoscript II 1<sup>st</sup> Strand  
526 cDNA Synthesis kit (NEB) following the manufacturer's instructions. The region of zebrafish  
527 *syn2a* encoding the KASH domain was PCR amplified from cDNA using Q5 high fidelity Taq  
528 polymerase (NEB) using the forward primer: 5'-CCACCATGCGCTCGTTCTTCTACCGTGT-  
529 3' and reverse primer: 5'-TCATGTTGGAGGAGGGCCGT-3'. The PCR fragment was digested  
530 with EcoRI and ligated into EcoRI digested pCS2+ (Rupp et al. 1994). Orientation was  
531 confirmed by sequencing (TCAG DNA Sequencing Facility, Hospital for Sick Children).

532

### 533 **RNA Synthesis and Microinjection**

534 To generate *h2a-gfp*, *eb3-gfp*, and *c-syne2a* sense RNA, NotI digested plasmids were in vitro  
535 transcribed using the SP6 mMACHINE kit (Ambion). RNAs were purified with  
536 the MEGAclean kit (Ambion). Embryos were injected into the yolk of 1-cell stage embryos as

537 described (Bruce et al. 2003). Doses of injected RNA were: *eb3-gfp* (110 pg), *h2a-gfp* (25 pg),  
538 and *c-syne2a* (50 pg).

539

#### 540 **Generation of Tg:(XIEefl1:GFP-tuba8l) Transgenic Zebrafish**

541 To generate an GFP-tubulin fusion construct, primers were designed to amplify the coding region  
542 of zebrafish *tubulin, alpha 2 (tuba2)*. The forward primer was 5'-

543 ATGCGTGAGTGTATCTCCAT-3' and the reverse primer was 5'-

544 CTAATACTCCTCACCTTCCT-3'. RT-PCR was performed on shield stage cDNA and the PCR  
545 product was cloned into pGEM-T Easy (Promega). Sequencing revealed that the PCR product

546 corresponded to *tubulin alpha 8 like (tuba8l)*. The *tuba8l* coding sequence was cloned into the

547 EcoRI site of pCS2+. GFP was PCR amplified from the UAS:eGFP-tuba2 plasmid (Asakawa &  
548 Kawakami 2010) using primers containing BamHI and ClaI restriction sites (forward primer: 5'-

549 ACGGGATCCGCCACCATGGTGAGCAAGGGCGAGGAGCTG-3' and reverse primer: 5'-

550 CCGCCGATCGATCTTGACAGCTCGTCCATGC-3'). Following restriction enzyme digest  
551 with BamHI and ClaI, the EGFP coding sequence was cloned in-frame upstream of *tuba8l*.

552

553 For transgenesis, *GFP-tuba8l* was excised from pCS2+ using BamHI and XhoI restriction sites

554 with the XhoI end blunted and inserted downstream of the elongation factor 1 promoter in the

555 Tol2 vector pT2KXIG $\Delta$ in (Urasaki et al. 2006) using the BamHI and ClaI sites with the ClaI end

556 blunted. Tg:(XIEefl1:GFP-tuba8l) transgenic zebrafish were generated using Tol2 transposon-

557 mediated germline transmission (Kotani et al. 2006). Embryos at the 1-cell stage were injected

558 with transposase RNA and pT2KXIG $\Delta$ in-GFP-tuba8l plasmid and fluorescent embryos were

559 selected at 24 hpf and grown to adulthood. GFP positive embryos from the founder generation

560 were raised to adulthood. The first generation of Tg:(XIEefl1:GFP-tuba8l) were genotyped by

561 crossing to wild type fish and collecting embryos at 24 hpf. Genomic DNA was prepared from

562 approximately 100 embryos per pair and PCR amplification was performed using Taq

563 polymerase (NEB) (forward primer: 5'-ACGGGATCCGCCAC

564 CATGGTGAGCAAGGGCGAGGAG-3' and reverse primer: 5'-

565 ATGAACTTCAGGGTCAGCTTGC-3').

566

#### 567 **Whole-mount immunohistochemistry**

568 The following primary antibodies (1:500 dilution) were used: rabbit anti-tubulin-detyrosinated  
569 (AB3201, EMD Millipore), mouse anti- $\gamma$ -tubulin clone GTU-88 (T6557, Sigma-Aldrich), and  
570 mouse anti- $\alpha$ -tubulin DM1A (T6199, Sigma-Aldrich). The following secondary antibodies were  
571 used at 1:1000: goat-anti-rabbit Alexa 488 (A-11008, Invitrogen) and goat-anti-mouse Alexa 488  
572 (A-11001, Invitrogen). Microtubule antibody staining was performed as described (Topczewski  
573 and Solnica-Krezel, 1999) with the following modifications: embryos were fixed in 3.7%  
574 formaldehyde, 0.2% triton X-100 in microtubule stabilization buffer and fixation time was 1.5  
575 hours at room temperature or overnight at 4°C.

576

### 577 **Imaging**

578 Live and fixed embryos were imaged using a Quorum WAVEFX spinning disk, a Zeiss LSM  
579 510, or a Leica TCS SP8 confocal microscope. Manually dechorionated live embryos were  
580 mounted in 0.4-0.8% low melt agarose (Invitrogen) and immunostained embryos were mounted  
581 in small drops of 80% glycerol on glass bottom dishes (MatTek).

582

### 583 **Fluorescence intensity measurements of the Dim Zone and PIV analysis**

584 Images were acquired with a Leica TCS SP8 laser scanning confocal microscope using a HC PL  
585 APO CS2 20x/0.75 IMM (N.A. 0.75) from Tg:(dclk2DeltaK-GFP) and Tg:(XIEefla1:GFP-  
586 tuba81) zebrafish. An oval was fit to the embryo and the region outside of the embryo was  
587 masked to exclude irrelevant signal and improve the clarity of the fluorescence profiles. Images  
588 were divided along the lateral axis in to 8 equally sized bins that ran the length of the animal –  
589 vegetal pole. The mean animal – vegetal intensity profile of each bin was plotted. A central  
590 subdivision was used to create the kymographs. Fluorescence intensity profiles from the  
591 kymographs were modeled with a polynomial fit and the local minima was used to define the  
592 position of the dim zone.

593

594 Prior to PIV analysis, stationary background signal was removed by subtracting the mean of all  
595 the time points from each time point in the series to better detect changes in intensity. For time  
596 lapses of Tg:(dclk2DeltaK-GFP) embryos, analysis was restricted to a region of interest just  
597 vegetal to the dim zone and this region of interest was updated for each time point as the dim  
598 zone moved vegetally. Images were subdivided into 8x8 pixel interrogation windows with 50%  
599 overlaps. For time-lapses of embryos expressing EB3-GFP, analysis was restricted to a

600 rectangular region of interest in the center of the embryo, and images were subdivided into 16x16  
601 pixel interrogation windows with 50% overlap. Each interrogation window was then cross-  
602 correlated with its corresponding window from the next time point to determine the direction and  
603 magnitude of fluorescence intensity movement. For the analysis of microtubule flows presented  
604 in Figure 2, vectors for each time point were summed over 5 consecutive time points to capture  
605 persistent movement and minimize noise. For Figure 2 time steps were: embryo 1: 5.2  
606 min/frame; embryo 2: 6.1 min/frame, embryo 3: 5.1 min/frame; embryo 4: 4.9 min/frame. For the  
607 analysis of EB3-GFP comet flows presented in Figure 4, vectors representing movement between  
608 individual frames (7.87 sec/frame) were used. The results presented are the mean displacement  
609 overtime in the lateral and A-V directions at each time point over the course of similar stages  
610 across embryos.

611

### 612 **YSN tracking and identification**

613 e-YSN were identified based on their shape and local absence of fluorescent signal in  
614 Tg:(dclk2DeltaK-GFP) and Tg:(XlEefla1:GFP-tuba81) time-lapse movies and tracked using the  
615 ImageJ plugin “Manual Tracking”. e-YSN were identified in H2A-GFP expressed embryos based  
616 on shape and position within the Z-stack.

617

### 618 **Acknowledgements**

619 AB thanks R. Winklbauer for many helpful discussions and insightful comments on the  
620 manuscript. We thank A. Akhmanova, M. Mione and K. Sampath for reagents and Henry Hong  
621 for confocal assistance.

622

### 623 **Competing Interests**

624 No competing interests declared.

### 625 **Funding**

626 Work in AB’s lab is funded by Grant 458019 from the Natural Sciences and Engineering  
627 Research Council of Canada.

628

### 629 **References**

630

631 Akhmanova, A. & Hoogenraad, C.C., 2015. Microtubule Minus-End-Targeting Proteins Review.  
632 *Curr Biol*, 25(4), pp. R162–R171.

633 Arendt, D. & Nübler-Jung, K., 1999. Rearranging gastrulation in the name of yolk: evolution of  
634 gastrulation in yolk-rich amniote eggs. *Mech dev*, 81(1-2), pp.3–22.

635 Asakawa, K. & Kawakami, K., 2010. A transgenic zebrafish for monitoring in vivo microtubule  
636 structures. *Dev Dyn*, 239(10), pp.2695–2699.

- 637 Bailey, M.E., Sackett, D.L. & Ross, J.L., 2015. Katanin Severing and Binding Microtubules Are  
638 Inhibited by Tubulin Carboxy Tails. *Biophys J*, 109(12), pp.2546–2561.
- 639 Bachop, W.E., Schwartz, F.J., 1974. Quantitative nucleic acid histochemistry of the yolk sac  
640 syncytium of oviparous teleosts: Implications for hypotheses of yolk utilization. In: Blaxter  
641 J.H.S., editor. *The Early Life History of Fishes*. Berlin: Springer-Verlag. pp. 345–353.  
642
- 643 Behrndt, M. et al., 2012. Forces driving epithelial spreading in zebrafish gastrulation. *Science*,  
644 338(6104), pp.257–260.
- 645 Bone, C.R. & Starr, D.A., 2016. Nuclear migration events throughout development. *J Cell Sci*,  
646 129(10), pp.1951–1961.
- 647 Bruce, A.E.E., 2016. Zebrafish epiboly: Spreading thin over the yolk. *Dev Dyn*, 245(3), pp.244–  
648 258.
- 649 Bruce, A.E.E. & Sampath, K., 2008. Morphing Morphogenesis. *Zebrafish*, 5(3), pp.197–200.
- 650 Bruce, A.E.E. et al., 2003. The maternally expressed zebrafish T-box gene eomesodermin  
651 regulates organizer formation. *Development*, 130(22), pp.5503–5517.
- 652 Bulinski, J.C. & Gundersen, G.G., 1991. Stabilization of post-translational modification of  
653 microtubules during cellular morphogenesis. *BioEssays*, 13(6), pp.285–293.
- 654 Campbell, P.D. & Marlow, F.L., 2013. Temporal and tissue specific gene expression patterns of  
655 the zebrafish kinesin-1 heavy chain family, kif5s, during development. *Gene expression*  
656 *patterns*, 13(7), pp.271–279.
- 657 Carvalho, L. & Heisenberg, C.-P., 2010. The yolk syncytial layer in early zebrafish development.  
658 *Trends Cell Biol*, 20(10), pp.586–592.
- 659 Carvalho, L. et al., 2009. Control of convergent yolk syncytial layer nuclear movement in  
660 zebrafish. *Development*, 136(8), pp.1305–1315.
- 661 Chang, W., Worman, H.J. & Gundersen, G.G., 2015. Accessorizing and anchoring the LINC  
662 complex for multifunctionality. *J Cell Biol*, 208(1), pp.11–22.
- 663 Chang, Y.-C. et al., 2008. GEF-H1 couples nocodazole-induced microtubule disassembly to cell  
664 contractility via RhoA. *Molec Biol Cell*, 19(5), pp.2147–2153.
- 665 Chen, S.R. & Kimelman, D., 2000. The role of the yolk syncytial layer in germ layer patterning  
666 in zebrafish. *Development*, 127(21), pp.4681–4689.
- 667 Cheng, J.C., Miller, A.L. & Webb, S.E., 2004. Organization and function of microfilaments  
668 during late epiboly in zebrafish embryos. *Dev Dyn*, 231(2), pp.313–323.
- 669 Cooper, M.S. & Virta, V.C., 2007. Evolution of gastrulation in the ray-finned (actinopterygian)  
670 fishes. *J Exp Zool Part B*, 308B(5), pp.591–608.
- 671 D'Amico, L.A. & Cooper, M.S., 2001. Morphogenetic domains in the yolk syncytial layer of

- 672 axiating zebrafish embryos. *Dev Dyn*, 222(4), pp.611–624.
- 673 Dupin, I. & Etienne-Manneville, S., 2011. Nuclear positioning: mechanisms and functions. *Int*  
674 *Journal Biochem Cell Biol*, 43(12), pp.1698–1707.
- 675 Fekany, K. et al., 1999. The zebrafish bozozok locus encodes Dharma, a homeodomain protein  
676 essential for induction of gastrula organizer and dorsoanterior embryonic structures.  
677 *Development*, 126(7), pp.1427–1438.
- 678 Fekany-Lee, K. et al., 2000. The homeobox gene bozozok promotes anterior neuroectoderm  
679 formation in zebrafish through negative regulation of BMP2/4 and Wnt pathways.  
680 *Development*, 127(11), pp.2333–2345.
- 681 Feldman, B. et al., 1998. Zebrafish organizer development and germ-layer formation require  
682 nodal-related signals. *Nature*, 395(6698), pp.181–185.
- 683 Grady, R.M. et al., 2005. Syne proteins anchor muscle nuclei at the neuromuscular junction. *Proc*  
684 *Ntl Acad Sci*, 102(12), pp.4359–4364.
- 685 Gritsman, K., Talbot, W.S. & Schier, A.F., 2000. Nodal signaling patterns the organizer.  
686 *Development*, 127(5), pp.921–932.
- 687 Gundersen, G.G. & Worman, H.J., 2013. Nuclear positioning. *Cell*, 152(6), pp.1376–1389.
- 688 Heald, R. & Nogales, E., 2002. Microtubule dynamics. *J Cell Sci*, 115(Pt 1), pp.3–4.
- 689 Ho, C.Y. et al., 1999. A role for the extraembryonic yolk syncytial layer in patterning the  
690 zebrafish embryo suggested by properties of the hex gene. *Curr Biol*, 9(19), pp.1131–1134.
- 691 Hong, S.-K. et al., 2010. Pre-gastrula expression of zebrafish extraembryonic genes. *BMC Dev*  
692 *Biol*, 10(1), p.42.
- 693 Hsu, H.-J. et al., 2006. Pregnenolone stabilizes microtubules and promotes zebrafish embryonic  
694 cell movement. *Nature*, 439(7075), pp.480–483.
- 695 Ikegami, K. & Setou, M., 2010. Unique post-translational modifications in specialized  
696 microtubule architecture. *Cell Struc Func*, 35(1), pp.15–22.
- 697 Infante, A.S. et al., 2000. Detyrosinated (Glu) microtubules are stabilized by an ATP-sensitive  
698 plus -end cap. *J Cell Sci*, 113 ( Pt 22), pp.3907–3919.  
699
- 700 Ishihara, K. et al., 2014. Microtubule nucleation remote from centrosomes may explain how  
701 asters span large cells. *Proc Ntl Acad Sci USA*, 111(50), pp.17715–17722.
- 702 Janke, C. & Chloë Bulinski, J., 2011. Post-translational regulation of the microtubule  
703 cytoskeleton: mechanisms and functions. *Nat Rev Molec Cell Biol*, 12(12), pp.773–786.
- 704 Jiang, K. et al., 2014. Microtubule minus-end stabilization by polymerization-driven CAMSAP  
705 deposition. *Dev Cell*, 28(3), pp.295–309.

- 706 Kane, D.A., Warga, R.M. & Kimmel, C.B., 1992. Mitotic domains in the early embryo of the  
707 zebrafish. *Nature*, 360(6406), pp.735–737.
- 708 Kimmel, C.B. & Law, R.D., 1985. Cell lineage of zebrafish blastomeres. II. Formation of the  
709 yolk syncytial layer. *Dev Biol*, 108(1), pp.86–93.
- 710 Kimmel, C.B. et al., 1995. Stages of embryonic development of the zebrafish. *Dev Dyn*, 203(3),  
711 pp.253–310.
- 712 Koos, D.S. & Ho, R.K., 1998. The *nieuwkoid* gene characterizes and mediates a Nieuwkoop-  
713 center-like activity in the zebrafish. *Curr Biol*, 8(22), pp.1199–1206.
- 714 Kotani, T. et al., 2006. Transposon-mediated gene trapping in zebrafish. *Methods*, 39(3), pp.199–  
715 206.
- 716 Kreis, T.E., 1987. Microtubules containing detyrosinated tubulin are less dynamic. *EMBO J*,  
717 6(9), pp.2597–2606.
- 718 Lachnit, M., Kur, E. & Driever, W., 2008. Alterations of the cytoskeleton in all three embryonic  
719 lineages contribute to the epiboly defect of *Pou5f1/Oct4* deficient *MZspg* zebrafish embryos.  
720 *Dev Biol*, 315(1), pp.1–17.
- 721 Lee, S.-J., 2014. Dynamic regulation of the microtubule and actin cytoskeleton in zebrafish  
722 epiboly. *Biochem Biophys Res Comm*, 452(1), pp.1–7.
- 723 Lepage, S.E. & Bruce, A.E.E., 2010. Zebrafish epiboly: mechanics and mechanisms. *Int J Dev*  
724 *Biol*, 54(8-9), pp.1213–1228.
- 725 Lindeman, R.E. & Pelegri, F., 2012. Localized products of *futile cycle/lrmp* promote centrosome-  
726 nucleus attachment in the zebrafish zygote. *Curr Biol*, 22(10), pp.843–851.
- 727 Long, W.L. & Ballard, W.W., 2001. Normal embryonic stages of the Longnose Gar, *Lepisosteus*  
728 *osseus*. *BMC Dev Biol*, 1(1), p.6.
- 729 Lüders, J. & Stearns, T., 2007. Microtubule-organizing centres: a re-evaluation. *Nat Rev Molec*  
730 *Cell Biol*, 8(2), pp.161–167.
- 731 Meyerzon, M. et al., 2009. UNC-83 is a nuclear-specific cargo adaptor for kinesin-1-mediated  
732 nuclear migration. *Development*, 136(16), pp.2725–2733.
- 733 Mizuno, T. et al., 1999. Removal of vegetal yolk causes dorsal deficiencies and impairs dorsal-  
734 inducing ability of the yolk cell in zebrafish. *Mech Dev*, 81(1-2), pp.51–63.
- 735 Nagai, H. et al., 2015. Cellular analysis of cleavage-stage chick embryos reveals hidden  
736 conservation in vertebrate early development. *Development*, 142(7), pp.1279–1286.
- 737 Ober, E.A. & Schulte-Merker, S., 1999. Signals from the yolk cell induce mesoderm,  
738 neuroectoderm, the trunk organizer, and the notochord in zebrafish. *Dev Biol*, 215(2),  
739 pp.167–181.



- 740 Palazzo, A.F. et al., 2001. mDia mediates Rho-regulated formation and orientation of stable  
741 microtubules. *Nat Cell Biol*, 3(8), pp.723–729.
- 742 Panda, D. et al., 1994. Microtubule dynamics in vitro are regulated by the tubulin isotype  
743 composition. *Proc Ntl Acad Sci*, 91(24), pp.11358–11362.
- 744 Petry, S. & Vale, R.D., 2015. Microtubule nucleation at the centrosome and beyond. *Nat Cell*  
745 *Biol*, 17(9), pp.1089–1093.
- 746 Petry, S. et al., 2013. Branching microtubule nucleation in *Xenopus* egg extracts mediated by  
747 augmin and TPX2. *Cell*, 152(4), pp.768–777.
- 748 Rodaway, A. et al., 1999. Induction of the mesendoderm in the zebrafish germ ring by yolk cell-  
749 derived TGF-beta family signals and discrimination of mesoderm and endoderm by FGF.  
750 *Development*, 126(14), pp.3067–3078.
- 751 Rupp, R.A., Snider, L. & Weintraub, H., 1994. *Xenopus* embryos regulate the nuclear  
752 localization of XMyoD. *Genes & Development*, 8(11), pp.1311–1323.
- 753 Sepich, D.S. et al., 2011. Wnt/PCP signaling controls intracellular position of MTOCs during  
754 gastrulation convergence and extension movements. *Development*, 138(3), pp.543–552.
- 755 Sirotkin, H.I. et al., 2000. Bozozok and squint act in parallel to specify dorsal mesoderm and  
756 anterior neuroectoderm in zebrafish. *Development*, 127(12), pp.2583–2592.
- 757 Solecki, D.J. et al., 2004. Par6alpha signaling controls glial-guided neuronal migration. *Nat*  
758 *Neurosci*, 7(11), pp.1195–1203.
- 759 Solnica-Krezel, L. & Driever, W., 1994. Microtubule arrays of the zebrafish yolk cell:  
760 organization and function during epiboly. *Development*, 120(9), pp.2443–2455.
- 761 Song, Y. & Brady, S.T., 2014. Post-translational modifications of tubulin: pathways to functional  
762 diversity of microtubules. *Trends Cell Biol*.
- 763 Starr, D.A. & Fridolfsson, H.N., 2010. Interactions Between Nuclei and the Cytoskeleton Are  
764 Mediated by SUN-KASH Nuclear-Envelope Bridges. *Ann Rev Cell Dev Biol*, 26(1), pp.421–  
765 444.
- 766 Stepanova, T. et al., 2003. Visualization of microtubule growth in cultured neurons via the use of  
767 EB3-GFP (end-binding protein 3-green fluorescent protein). *J Neurosci*, 23(7), pp.2655–  
768 2664.
- 769 Strähle, U. & Jesuthasan, S., 1993. Ultraviolet irradiation impairs epiboly in zebrafish embryos:  
770 evidence for a microtubule-dependent mechanism of epiboly. *Development*, 119(3), pp.909–  
771 919.
- 772 Sun, Y. et al., 2014. Extraembryonic Signals under the Control of MGA, Max, and Smad4 Are  
773 Required for Dorsoventral Patterning. *Dev Cell*, 28(3), pp.322–334.
- 774 Takesono, A. et al., 2010. Microtubules regulate migratory polarity through Rho/ROCK signaling

- 775 in T cells. *PLoS ONE*, 5(1), p.e8774.
- 776 Takesono, A. et al., 2012. Solute carrier family 3 member 2 (Slc3a2) controls yolk syncytial layer  
777 (YSL) formation by regulating microtubule networks in the zebrafish embryo. *Proc Natl Acad*  
778 *Sci USA*, 109(9), pp.3371–3376.
- 779 Thisse, B., Thisse, C., 2004. Fast Release Clones: A High Throughput Expression Analysis.  
780 ZFIN Direct Data Submission (<http://zfin.org>).
- 781
- 782 Thomas, R.J., 1968. Yolk Distribution and Utilization During Early Development of a Teleost  
783 Embryo (Brachydanio Rerio). *J Emb Exp Morph*, 19(2), pp.203–&.
- 784 Topczewski, J.J. and Solnica-Krezel, L., 1999. Cytoskeletal dynamics of the zebrafish embryo.  
785 *Methods Cell Biol*, 59 p.205 - 226.
- 786
- 787 Trinh, L.A. & Stainier, D.Y.R., 2004. Fibronectin regulates epithelial organization during  
788 myocardial migration in zebrafish. *Dev Cell*, 6(3), pp.371–382.
- 789 Trinkaus, J.P., 1963. The cellular basis of Fundulus epiboly. Adhesivity of blastula and gastrula  
790 cells in culture. *Dev Biol*, 6, pp.513–532.
- 791 Trinkaus, J.P., 1993. The yolk syncytial layer of Fundulus: Its origin and history and its  
792 significance for early embryogenesis. *J Exp Zool*, 265(3), pp.258–284.
- 793 Tsujikawa, M. et al., 2007. Mechanism of positioning the cell nucleus in vertebrate  
794 photoreceptors. *Proc Natl Acad Sci*, 104(37), pp.14819–14824.
- 795 Umeshima, H., Hirano, T. & Kengaku, M., 2007. Microtubule-based nuclear movement occurs  
796 independently of centrosome positioning in migrating neurons. *Proc Natl Aca Sci*, 104(41),  
797 pp.16182–16187.
- 798 Urasaki, A., Morvan, G. & Kawakami, K., 2006. Functional dissection of the Tol2 transposable  
799 element identified the minimal cis-sequence and a highly repetitive sequence in the  
800 subterminal region essential for transposition. *Genetics*, 174(2), pp.639–649.
- 801 van der Vaart, B., Akhmanova, A. & Straube, A., 2009. Regulation of microtubule dynamic  
802 instability. *Biochem Soc Trans*, 37(Pt 5), pp.1007–1013.
- 803 Virta, V.C. & Cooper, M.S., 2011. Structural components and morphogenetic mechanics of the  
804 zebrafish yolk extension, a developmental module. *J Exp Zool Part B: Molec Dev Evo*,  
805 316(1), pp.76–92.
- 806 Wadeson, P.H. & Crawford, K., 2003. Formation of the blastoderm and yolk syncytial layer in  
807 early squid development. *Biol Bull*, 205(2), pp.179–180.
- 808 Webster, D.R. et al., 1987. Differential turnover of tyrosinated and detyrosinated microtubules.  
809 *Proc Natl Acad Sci*, 84(24), pp.9040–9044.
- 810 Weng, J.-H. et al., 2013. Pregnenolone activates CLIP-170 to promote microtubule growth and  
811 cell migration. *Nat Chem Biol*, 9(10), pp.636–642.

- 812 Williams-Masson, E.M. et al., 1998. The cellular mechanism of epithelial rearrangement during  
813 morphogenesis of the *Caenorhabditis elegans* dorsal hypodermis. *Dev Biol*, 204(1), pp.263–  
814 276.
- 815 Williams-Masson, E.M., Malik, A.N. & Hardin, J., 1997. An actin-mediated two-step mechanism  
816 is required for ventral enclosure of the *C. elegans* hypodermis. *Development*, 124(15),  
817 pp.2889–2901.
- 818 Wojnacki, J. et al., 2014. Rho GTPases at the crossroad of signaling networks in mammals:  
819 impact of Rho-GTPases on microtubule organization and dynamics. *Small GTPases*, 5(1),  
820 p.e28430.
- 821 Xu, C. et al., 2012. Nanog-like Regulates Endoderm Formation through the Mxtx2-Nodal  
822 Pathway. *Dev Cell*, 22(3), pp.625–638.
- 823 Yasuda, K. et al., 2017. FUS inclusions disrupt RNA localization by sequestering kinesin-1 and  
824 inhibiting microtubule detyrosination. *J Cell Biol*, 216(4), pp.1015–1034.
- 825
- 826

## 827 **Figure Legends**

### 828 **Figure 1. Changing yolk cell microtubule dynamics during epiboly.**

829 Panels are lateral views with the animal pole to the top. **(A)** Embryo schematics during epiboly,  
830 blastoderm, e-YSN, i-YSN, YSL and yolk cell indicated. **(B)** Sphere stage embryos. Left: alpha-  
831 tubulin antibody staining, right: Tg(XIEef1a1:dclk2DeltaK-GFP) embryo. Double headed arrow  
832 indicates e-YSN nucleating microtubule branches. **(C-E''')** Live confocal projections of 3  
833 Tg(XIEef1a1:dclk2DeltaK-GFP) embryos from early to late epiboly (left to right). **(C')** bracket  
834 marks the dim zone. **(C'')** Arrowheads indicate e-YSN. **(D'')** Arrowheads indicate gaps between  
835 microtubule branches. **(E')** Arrowhead points to clearing region vegetally. **(E'')** Inset shows  
836 magnified view of dim zone, arrowheads indicate microtubule fragments. Scale bar: 100  $\mu$ m.  
837

### 838 **Figure 2. The dim zone moves vegetally and is preceded by animally moving microtubules** 839 **from early to mid-epiboly.**

840 **(A)** Dim zone characterization. Masked time lapses showing only the embryo and no background  
841 (i) were separated in to 8 equally sized bins (ii). The mean across the lateral axis of each bin was  
842 taken and the resulting fluorescence profile was plotted (iii) and the centrally located yellow bin  
843 was used for subsequent analyses (arrowhead in "ii"). Minima present between the blastoderm  
844 and the vegetal microtubule network of the yolk were used to define the location of the dim zone  
845 (iv, top panel) and the position the minima was plotted over time (iv, bottom panel). **(B)**  
846 Kymographs of dim zone. Dim zone locations (i.e. minima) as determined by the mean yellow  
847 profile are denoted by horizontal yellow bars. Red bars denote dim zone locations that were false  
848 upon inspection and therefore removed from subsequent analyses. Red boxes mark early to mid-  
849 epiboly stages and correspond to the red boxes shown in (C). **(C)** PIV analyses of A-V directed  
850 and laterally directed flow of microtubules from early to mid-epiboly (red boxes). In the first 3  
851 embryos, microtubule flow along the A-V axis (black lines) was directed animally, while lateral  
852 microtubule flow (red lines) was approximately zero. In the last embryo, microtubule flow was  
853 directed vegetally. Error bars show standard deviation. **(D)** Mean displacement of the  
854 microtubules per minute during early to mid-epiboly along A-V or lateral axes of the embryo.  
855 The data points represented in the plots are means for all vectors of a given time point. These sets  
856 of points for delta lateral and delta A-V were compared with 2-sided t-test using the matlab  
857 function `ttest2`, and \*\*\* indicates  $p < 0.0001$ . Stages that red boxed regions correspond to: embryo  
858 1: dome-60% epiboly; embryo 2: dome-75% epiboly; embryo 3: dome-60% epiboly; embryo 4:  
859 late sphere-65% epiboly.  
860

### 861 **Figure 3. Detyrosinated microtubules are detected at mid-epiboly.**

862 Lateral views with the animal pole to the top of anti-detyrosinated tubulin stained embryos. **(A)**  
863 Sphere stage embryos showing absence of staining in the yolk cell, a small region of the  
864 blastoderm is visible at the top. **(B)** 60% epiboly stage embryo, detyrosinated tubulin is detected  
865 in the blastoderm and in the yolk cell (arrow). Arrowhead indicates e-YSN. Scale bar: 100  $\mu$ m.  
866

### 867 **Figure 4. EB3-GFP reveals extensive microtubule polymerization during early epiboly.**

868 **(A)** Lateral confocal projections of wild-type embryos injected with *eb3-gfp* RNA, stages as  
869 indicated, animal pole up and slightly left. EB3-GFP fluorescent comets (visible as streaks)  
870 extend from the YSL into the YCL from sphere to 50% epiboly stage. By 60% epiboly comets  
871 were primarily confined to the e-YSL. Arrowhead indicates e-YSN centrosomes. Yellow lines  
872 mark boundary between the blastoderm and YSL. Scale bar: 50  $\mu$ m. **(B)** PIV analysis of EB3-  
873 GFP fluorescent comet flow. Left panel shows still from single plane time-lapse movie analyzed.

874 Blastoderm at the top right. Mean flow speed along A-V and lateral axes of the embryo measured  
875 as the mean of all vectors in a given time point. Positive flow along the A-V axis represents  
876 movement from the animal pole to the vegetal pole. These sets of points for lateral and A-V  
877 speed were compared with 2-sided t-test using the matlab function `ttest2`, and \*\*\* indicates  
878  $p < 0.0001$ . Right panel shows rose plot of PIV vector angles showing that vectors representing  
879 EB3-GFP movement are aligned with the A-V axis and directed vegetally.

880  
881 **Figure 5. E-YSN move along and beneath the microtubule network.**  
882 (A-C) Lateral views with the animal pole to the top. (A) Stills from a confocal time-lapse of a  
883 Tg:(XIEefl1:GFP-tuba81) embryo during mid-epiboly. Arrowheads indicate migrating e-YSN  
884 forming a chain. Scale bar: 25  $\mu\text{m}$ . (B) e-YSN migration speeds from confocal-time lapse movies  
885 of 6 individual embryos and combined data. Embryos 1-5 were *dclk2DeltaK*-GFP transgenic  
886 embryos and embryo 6 was a GFP-tuba81 transgenic embryo. The time-lapse for embryo 6 was  
887 considerably shorter than for the other embryos which may explain the broader speed  
888 distribution. (C) Stills from spinning disk confocal time-lapse of Tg:(XIEefl1:GFP-tuba81)  
889 embryo injected with *h2a-gfp* RNA. The e-YSN becomes elongated and leading tip of e-YSN  
890 becomes pointed during migration (yellow arrows). Scale bar: 10  $\mu\text{m}$ . (D) Depth coded  
891 projection from spinning disk confocal of Tg:(XIEefl1:GFP-tuba81) embryo injected with *h2a-*  
892 *gfp* RNA. The e-YSN is positioned largely beneath the microtubule network. Scale bar: 10  $\mu\text{m}$ .

893  
894 **Figure 6. Overexpression of *c-syne2a* disrupts e-YSN migration.**  
895 Temporal color coding of selected frames from confocal time lapse movies of *h2a-gfp* injected  
896 control and *h2a-gfp* plus *c-syne2a* injected embryos. Typical migrating e-YSN labeled with #1 in  
897 control embryo. In the *c-syne2a* injected embryo: cell #1 is overrun by the blastoderm, cell #2  
898 turns perpendicular to the A-V axis and cell #3 starts to turn perpendicularly. Similar e-YSN  
899 behaviors were observed in *c-syne2a* injected embryos in 4 independent experiments.

900  
901 **Figure 7. Model and Time-Line**  
902 Lateral views of schematic embryo with YSN and microtubules depicted, animal pole to the top  
903 and event timing below. Dashed black lines indicate stages and dashed grey lines indicate  
904 beginning and end of a given stage. bThe dim zone is represented by the green shaded area.  
905 Exactly when detyrosinated microtubules appear is unclear, as indicated by gray bar and question  
906 mark.

907

908 **Tables**

909

910 **Table 1.** Mean dim zone movement speeds (towards vegetal pole).

| <b>Embryo</b>  | <b>Mean speed (<math>\mu\text{m}/\text{min}</math>)</b> | <b>S.E.M.</b> | <b>S.D.</b> |
|----------------|---------------------------------------------------------|---------------|-------------|
| <b>1</b>       | 1.046354                                                | 0.225101      | 1.714318    |
| <b>2</b>       | 0.729579                                                | 0.405647      | 3.369559    |
| <b>3</b>       | 0.446679                                                | 0.164669      | 1.296606    |
| <b>4</b>       | 1.325641                                                | 0.467083      | 2.642221    |
| <b>5</b>       | 0.989935                                                | 0.392737      | 2.078171    |
| <b>6</b>       | 0.567122                                                | 0.550748      | 1.907846    |
| <b>Overall</b> | 0.826313                                                | 0.145526      | 2.351045    |

911

912 **Table 2.** Mean e-YSN migration speeds per embryo (towards vegetal pole).

| <b>Embryo</b>  | <b>Mean speed (<math>\mu\text{m}/\text{min}</math>)</b> | <b>S.E.M.</b> | <b>S.D.</b> |
|----------------|---------------------------------------------------------|---------------|-------------|
| <b>1</b>       | 2.463912                                                | 0.051756      | 0.903886    |
| <b>2</b>       | 1.994247                                                | 0.069696      | 1.099791    |
| <b>3</b>       | 1.903754                                                | 0.061245      | 1.021159    |
| <b>4</b>       | 1.779376                                                | 0.045326      | 0.678379    |
| <b>5</b>       | 1.584370                                                | 0.029046      | 0.783166    |
| <b>6</b>       | 4.541615                                                | 0.339505      | 2.352159    |
| <b>Overall</b> | 1.936493                                                | 0.025346      | 1.084550    |

913

914

915

916

917 **Supplementary Table 1: Individual mean e-YSN speeds.**

| Embryo   | YSN # | Mean YSN Speed (um/min) | S.D.    | Mean YSN Speed per embryo (um/min) | S.D.    | S.E.M.  |
|----------|-------|-------------------------|---------|------------------------------------|---------|---------|
| Embryo 1 | 1     | 2.64305                 | 0.85958 | 2.46391                            | 0.90389 | 0.05176 |
|          | 2     | 2.77741                 | 0.69480 |                                    |         |         |
|          | 3     | 2.26534                 | 0.89144 |                                    |         |         |
|          | 4     | 2.59946                 | 0.78143 |                                    |         |         |
|          | 5     | 2.51469                 | 0.99693 |                                    |         |         |
|          | 6     | 1.99625                 | 0.77162 |                                    |         |         |
|          | 7     | 3.14132                 | 0.61522 |                                    |         |         |
|          | 8     | 3.01033                 | 0.85603 |                                    |         |         |
|          | 9     | 2.48771                 | 0.81211 |                                    |         |         |
|          | 10    | 2.00142                 | 0.54466 |                                    |         |         |
|          | 11    | 2.26560                 | 0.63658 |                                    |         |         |
|          | 12    | 2.44936                 | 0.84536 |                                    |         |         |
|          | 13    | 2.46949                 | 1.41007 |                                    |         |         |
|          | 14    | 1.88555                 | 0.71601 |                                    |         |         |
| Embryo 2 | 1     | 1.66780                 | 0.88297 | 1.99425                            | 1.09979 | 0.06970 |
|          | 2     | 2.21962                 | 0.97129 |                                    |         |         |
|          | 3     | 2.86542                 | 0.96104 |                                    |         |         |
|          | 4     | 1.90615                 | 1.37631 |                                    |         |         |
|          | 5     | 1.53582                 | 0.59896 |                                    |         |         |
|          | 6     | 1.99716                 | 1.28856 |                                    |         |         |
|          | 7     | 2.14843                 | 1.20684 |                                    |         |         |
|          | 8     | 1.95427                 | 0.92599 |                                    |         |         |
|          | 9     | 2.01174                 | 0.93745 |                                    |         |         |
| Embryo 3 | 1     | 1.56964                 | 0.88809 | 1.90375                            | 1.02116 | 0.06125 |
|          | 2     | 1.47126                 | 0.74640 |                                    |         |         |
|          | 3     | 2.43459                 | 1.21290 |                                    |         |         |
|          | 4     | 1.85564                 | 1.02315 |                                    |         |         |
|          | 5     | 1.68283                 | 1.02704 |                                    |         |         |
|          | 6     | 1.97119                 | 0.71362 |                                    |         |         |
|          | 7     | 2.48182                 | 0.89896 |                                    |         |         |
|          | 8     | 2.30934                 | 1.16967 |                                    |         |         |
|          | 9     | 2.65451                 | 1.01697 |                                    |         |         |
| Embryo 4 | 1     | 1.79586                 | 0.61101 | 1.77938                            | 0.67838 | 0.04533 |
|          | 2     | 1.74782                 | 0.59338 |                                    |         |         |
|          | 3     | 1.81152                 | 0.72883 |                                    |         |         |
|          | 4     | 1.91332                 | 0.99313 |                                    |         |         |
|          | 5     | 1.86068                 | 0.79398 |                                    |         |         |
|          | 6     | 1.79633                 | 0.55116 |                                    |         |         |
|          | 7     | 1.56949                 | 0.50300 |                                    |         |         |
|          | 8     | 1.67464                 | 0.46723 |                                    |         |         |

Supplementary Table 1 continued:

| Embryo   | YSN # | Mean YSN Speed (um/min) | S.D.    | Mean YSN Speed per embryo (um/min) | S.D.    | S.E.M.  |
|----------|-------|-------------------------|---------|------------------------------------|---------|---------|
| Embryo 5 | 1     | 1.65000                 | 0.67455 | 1.58437                            | 0.78317 | 0.02905 |
|          | 2     | 1.44608                 | 0.77222 |                                    |         |         |
|          | 3     | 1.20033                 | 0.46432 |                                    |         |         |
|          | 4     | 1.64052                 | 0.79410 |                                    |         |         |
|          | 5     | 1.64635                 | 0.64747 |                                    |         |         |
|          | 6     | 2.85348                 | 1.14968 |                                    |         |         |
|          | 7     | 1.59387                 | 0.96490 |                                    |         |         |
|          | 8     | 1.57089                 | 0.77610 |                                    |         |         |
|          | 9     | 1.54543                 | 0.54685 |                                    |         |         |
|          | 10    | 1.39236                 | 0.55407 |                                    |         |         |
|          | 11    | 1.31599                 | 0.55331 |                                    |         |         |
|          | 12    | 1.20709                 | 0.82376 |                                    |         |         |
|          | 13    | 1.39484                 | 0.54749 |                                    |         |         |
|          | 14    | 1.30414                 | 0.51379 |                                    |         |         |
|          | 15    | 1.35322                 | 0.41103 |                                    |         |         |
|          | 16    | 0.96060                 | 0.40852 |                                    |         |         |
|          | 17    | 2.05282                 | 0.85517 |                                    |         |         |
|          | 18    | 1.56094                 | 0.75835 |                                    |         |         |
|          | 19    | 2.13708                 | 0.83124 |                                    |         |         |
|          | 20    | 1.14382                 | 0.67141 |                                    |         |         |
|          | 21    | 1.41077                 | 0.38285 |                                    |         |         |
|          | 22    | 1.64397                 | 0.49593 |                                    |         |         |
|          | 23    | 2.90001                 | 0.72388 |                                    |         |         |
|          | 24    | 2.94019                 | 0.83398 |                                    |         |         |
|          | 25    | 2.02291                 | 0.54649 |                                    |         |         |
|          | 26    | 1.60681                 | 0.56840 |                                    |         |         |
|          | 27    | 1.56240                 | 0.58647 |                                    |         |         |
|          | 28    | 1.42596                 | 0.78403 |                                    |         |         |
| Embryo 6 | 1     | 5.27550                 | 3.10518 | 4.54161                            | 2.35216 | 0.33950 |
|          | 2     | 4.87002                 | 2.34267 |                                    |         |         |
|          | 3     | 7.23191                 | 1.55758 |                                    |         |         |
|          | 4     | 4.24308                 | 1.66159 |                                    |         |         |
|          | 5     | 2.89342                 | 1.19383 |                                    |         |         |

918  
919  
920



921 **Supplementary Figure Legends**

922 **Movie 1**

923 Confocal time-lapse movie of Tg(XIEef1a1:dclk2DeltaK-GFP) embryo from sphere stage to 80%  
924 epiboly. Lateral view with the animal pole to the top.

925

926 **Movie 2**

927 Confocal time-lapse movie of embryo expressing EB3-GFP. Lateral view with animal pole to the  
928 top.

929

930 **Movie 3**

931 Confocal time-lapse movie of embryo expressing EB3-GFP. e-YSN can be seen emerging from  
932 regions where EB3-GFP comets are emanating (arrows). Lateral view, animal pole towards left.  
933 Bright region at the top is the blastoderm.

934

935 **Movie 4**

936 Spinning disk confocal time-lapse movie of Tg (XIEef1a:eGFP-tub $\alpha$ 8l) embryo with H2A-GFP  
937 labeled e-YSN. Lateral view with animal pole towards the top.

938

939 **Movie 5**

940 Confocal time-lapse movie of H2A-GFP expressing control embryo. Lateral view with animal  
941 pole towards the upper right.

942

943 **Movie 6**

944 Confocal time-lapse movie of H2A-GFP and C-Syne2a expressing embryo. Lateral view with  
945 animal pole towards the upper left.

946

947

948

Figure 1

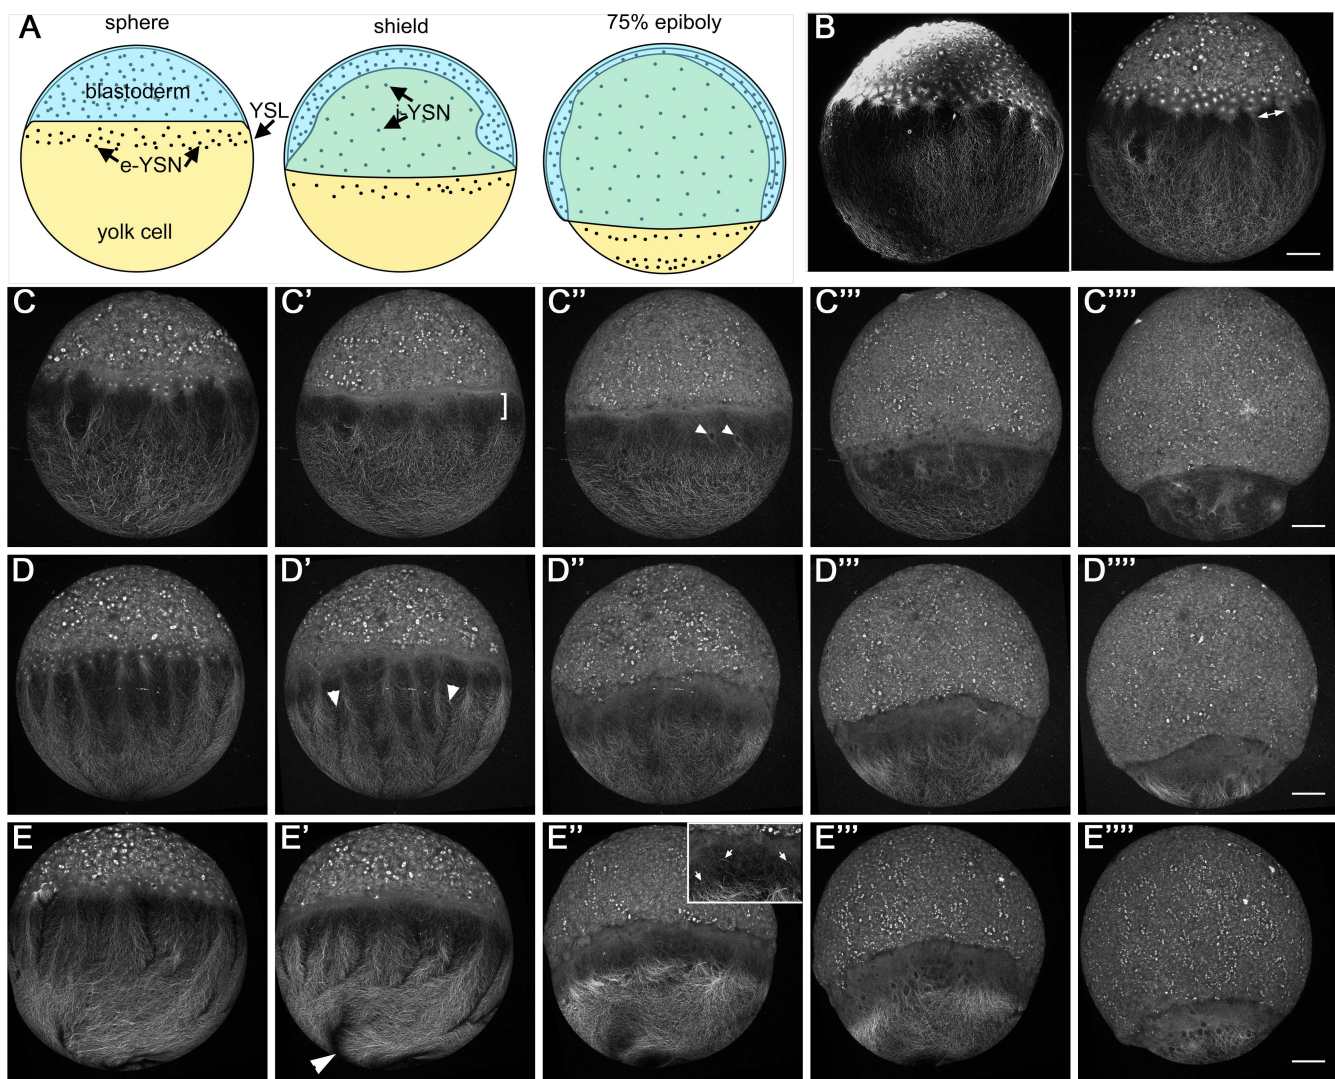

**Figure 2**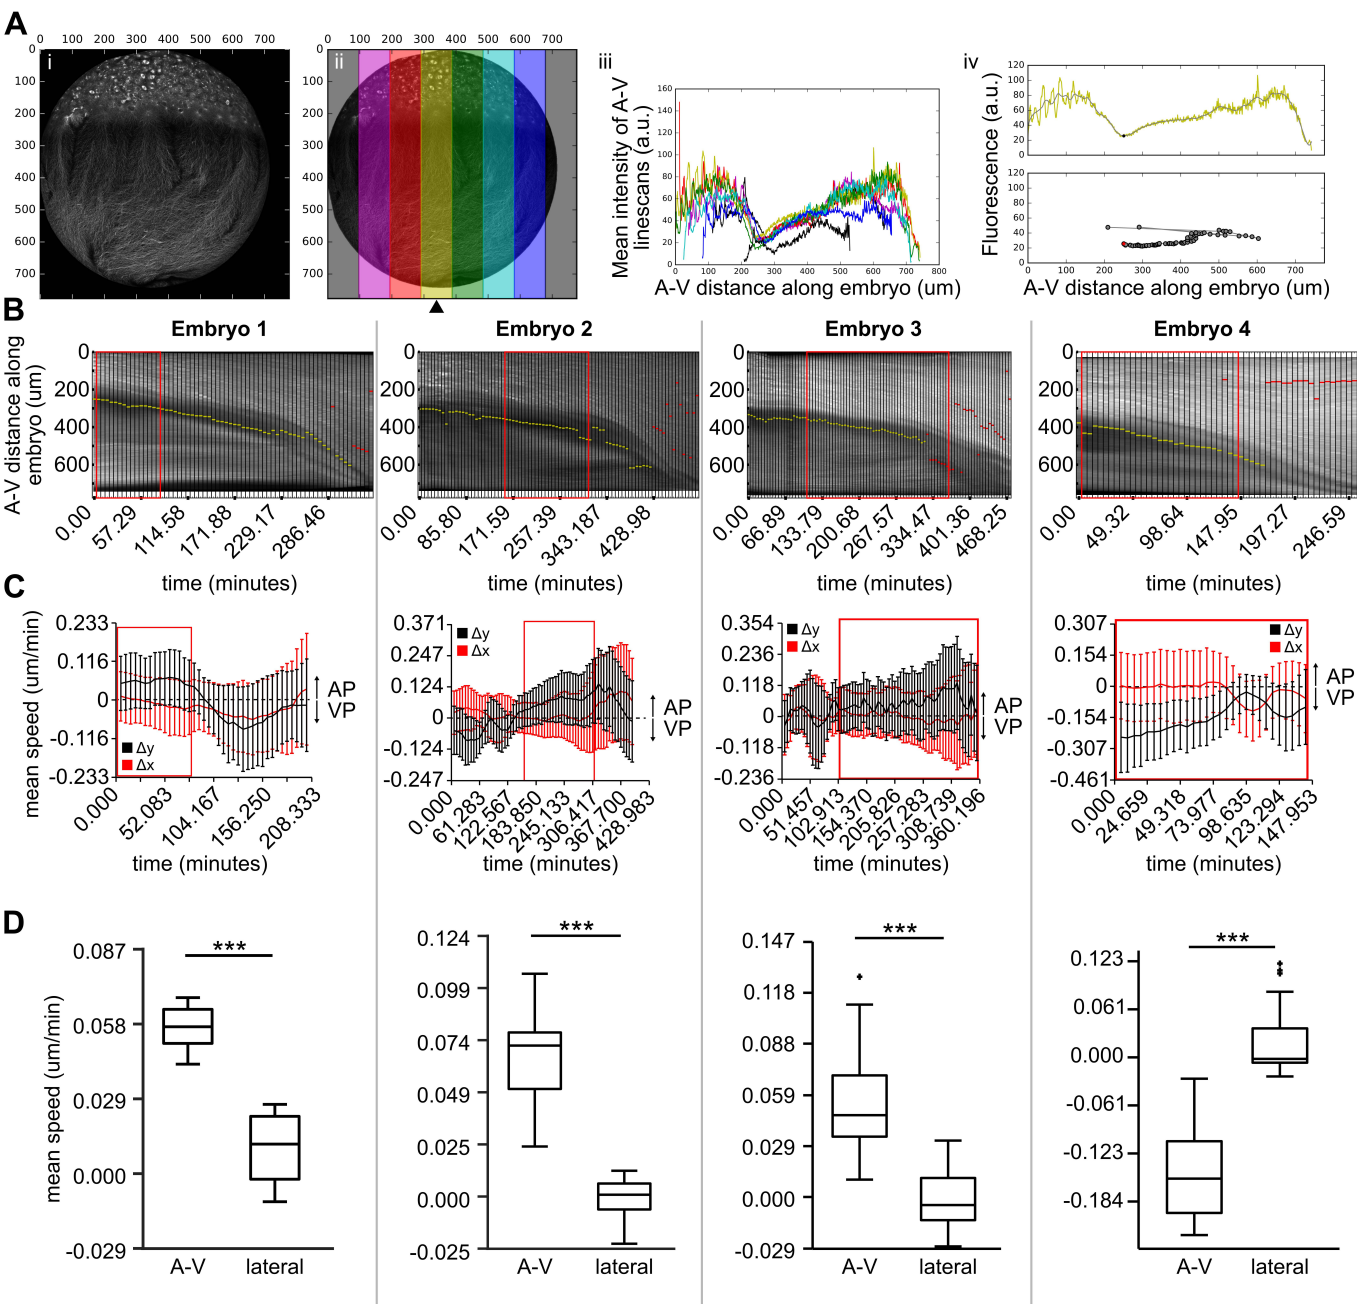

Figure 3

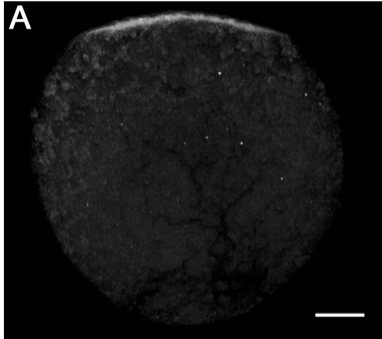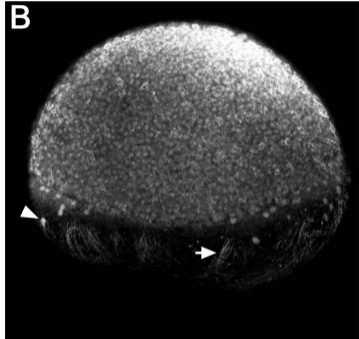

Figure 4

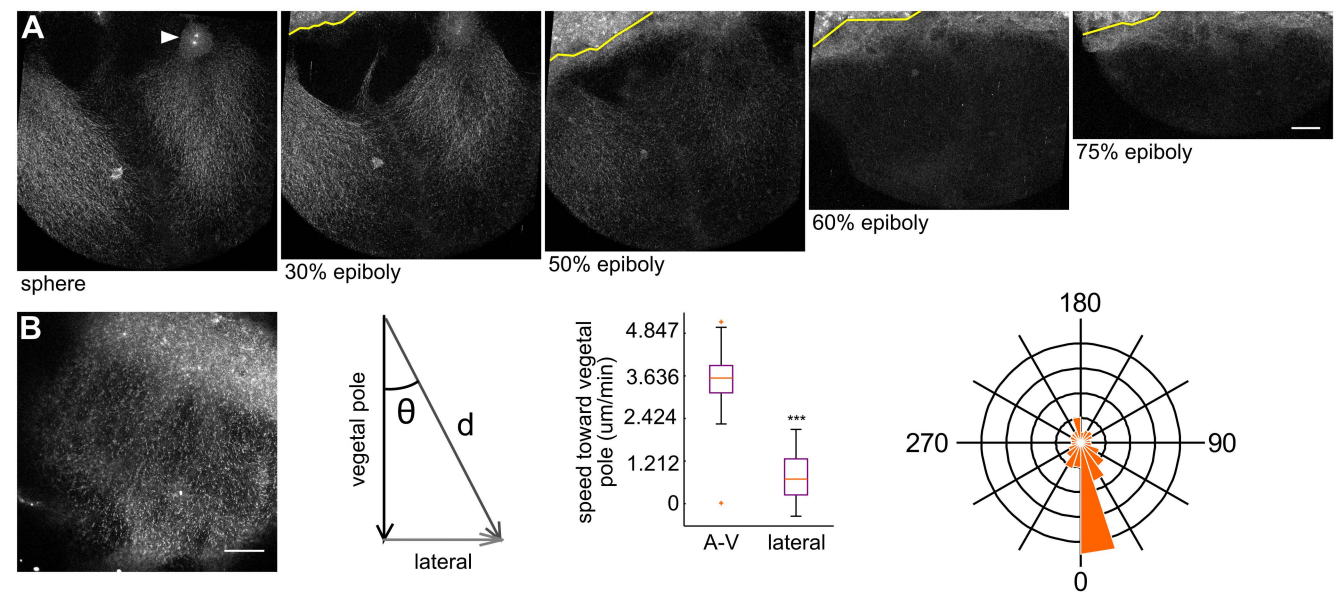

Figure 5

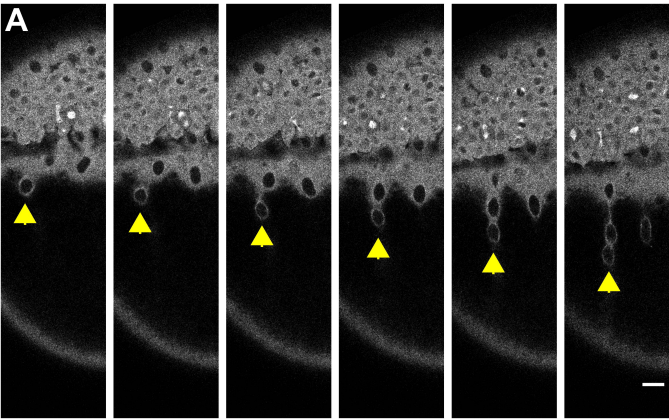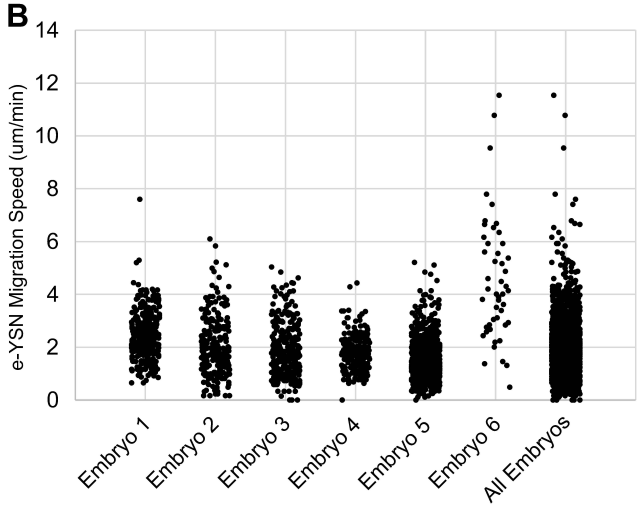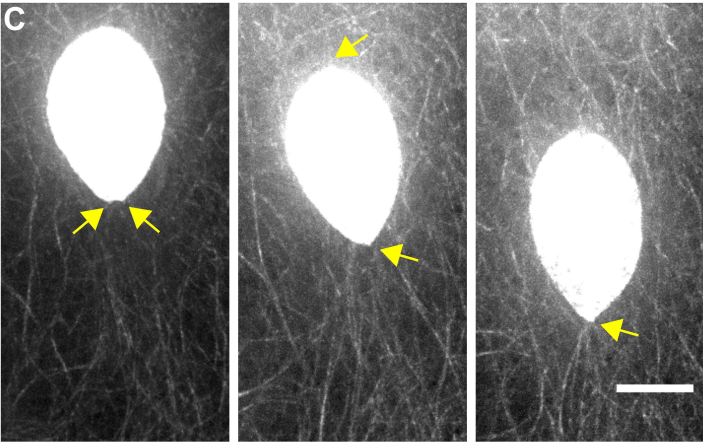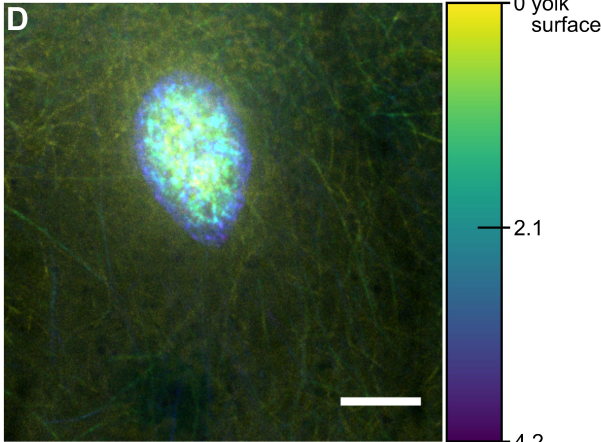

Figure 6

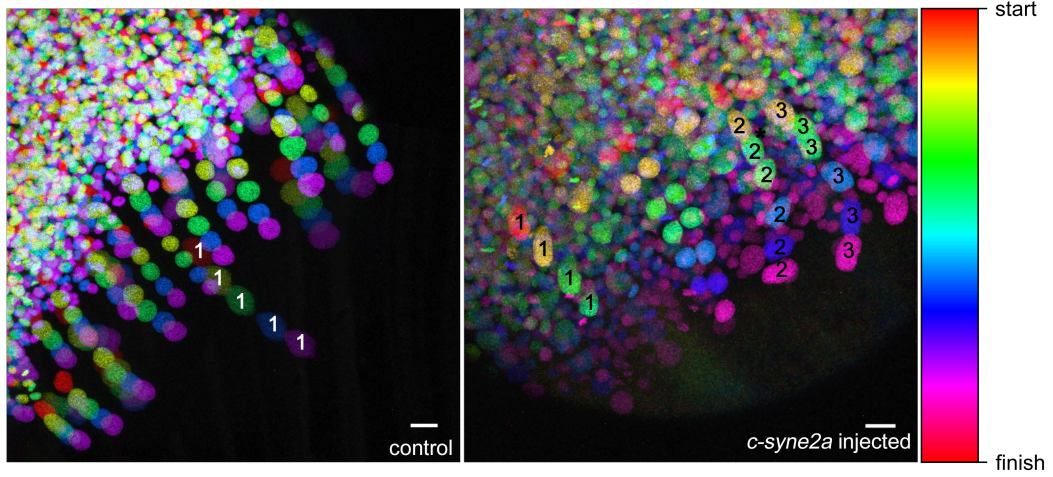

Figure 7

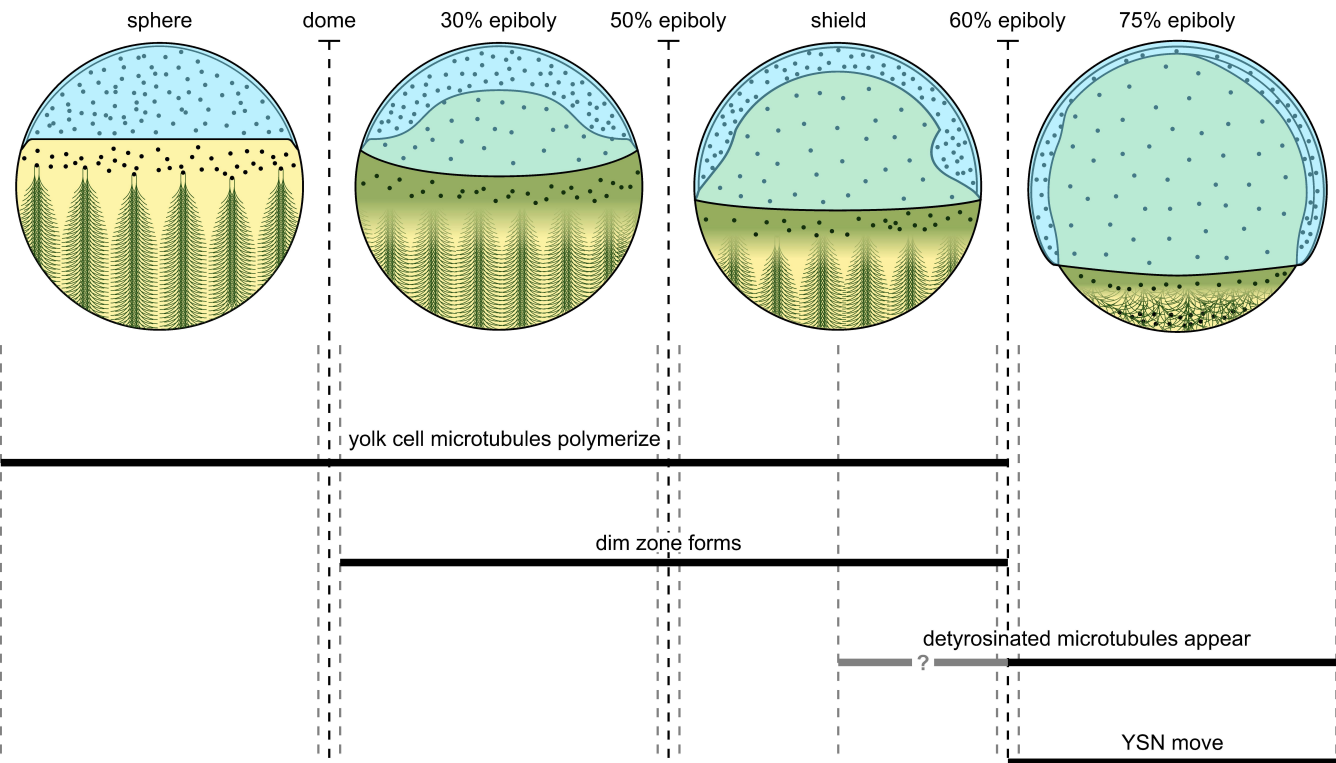

Source: https://www.biorxiv.org/content/10.1101/207795v1.full.pdf
